# Supplementary material for: Identification of karanjin isolated from the Indian beech tree as a potent CYP1 enzyme inhibitor with cellular efficacy via screening of a natural product repository
Source: Royal Society of Chemistry journal article supplement (doi:10.1039/c7md00388a), 2018-01-01
Supplement: c7md00388a1.pdf [file c7md00388a1.pdf]

## **Electronic Supporting Information**

### **Identification of karanjin isolated from Indian beech tree as potent CYP1 enzyme inhibitor with cellular efficacy via screening of a natural products repository**

**Prashant Joshi,<sup>a,b,§</sup> Vinay R. Sonawane,<sup>c,§</sup> Ibidapo S. Williams,<sup>c,d,§</sup> Glen J. P. McCann,<sup>c</sup> Linda Gatchie,<sup>c,d</sup> Rajni Sharma,<sup>b,e</sup> Naresh Satti,<sup>e</sup> Bhabatosh Chaudhuri<sup>c,\*</sup> and Sandip B. Bharate<sup>a,b,\*</sup>**

*<sup>a</sup>Medicinal Chemistry Division, CSIR-Indian Institute of Integrative Medicine, Canal Road, Jammu-180001, India.*

*<sup>b</sup>Academy of Scientific & Innovative Research (AcSIR), CSIR-Indian Institute of Integrative Medicine, Canal Road, Jammu-180001, India*

*<sup>c</sup>Leicester School of Pharmacy, De Montfort University, Leicester, LE1 9BH, UK*

*<sup>d</sup>CYP Design Limited, Innovation Centre, 49 Oxford Street, Leicester, LE1 5XY, UK*

*<sup>e</sup>Natural Product Chemistry Division, CSIR-Indian Institute of Integrative Medicine, Canal Road, Jammu-180001, India.*

*<sup>§</sup> PJ, VRS and ISW contributed equally as a first author.*

*\*Corresponding authors*

*Prof. Bhabatosh Chaudhuri  
Leicester School of Pharmacy,  
De Montfort University, Leicester,  
LE1 9BH, UK*

*Dr. Sandip B. Bharate  
Medicinal chemistry division, CSIR-Indian  
institute of integrative medicine Canal road  
Jammu*

*\*E-mail: E-mail: [bchaudhuri@dmu.ac.uk](mailto:bchaudhuri@dmu.ac.uk)*

*[sbharate@iiim.ac.in](mailto:sbharate@iiim.ac.in)*

## **CONTENTS**

- S1.** Experimental procedures
- S2.** CYP1A1 screening results in Sacchrosomes™
- S3.** HPLC purity of selected in-house natural product library hits.
- S4.** Karanjin is a competitive inhibitor of CYP1A1
- S5.** MD simulation and interactions of isopimpinellin (**IN-475**) with CYP1A1
- S6.** Interaction of isopimpinellin (**IN-475**) with CYP1, CYP2 and CYP3 isoforms
- S7.** Interactions of karanjin (**IN-195**) with CYP2 and CYP3 isoforms
- S8.** NMR, HPLC and HRMS data scans of IN-195 and IN-475

## **S1. EXPERIMENTAL PROCEDURES**

### ***In-vitro* CYP450 enzyme inhibition**

All CYP enzymes (Saccharosomes<sup>TM</sup>; human CYP enzymes bound to yeast microsomal membranes) used in this study were manufactured by CYP Design Ltd (Leicester, UK). This method was used to measure the percentage inhibition of a CYP450 by a compound or to determine the IC<sub>50</sub> values (the concentration at which 50% of the enzyme activity is inhibited) of a compound. Both percentage inhibition and IC<sub>50</sub> values effectively reflect the inhibitory potential of a compound and hint at the possible effectiveness of a compound in a biological process. Percentage inhibition is determined at a particular concentration of the compound which is usually 10 µM. An assay which determines IC<sub>50</sub> values includes the yeast microsomes that bear the cytochrome P450 enzymes (i.e. Sacchrosomes<sup>TM</sup>), a chosen chemical compound in six serial dilutions in DMSO (with DMSO concentration never exceeding 0.5%), 96-well flat-bottomed microtitre plate, substrates such as ER (7-ethoxyresorufin) or CEC (3-cyano-7-ethoxycoumarin) or EOMCC (7-ethoxy-methyloxy-3-cyanocoumarin) or DBF (dibenzylfluorescein), depending on the CYP450 used in the assay. The substrates form fluorescent compounds upon CYP metabolism. A fluorescent plate reader is used to monitor fluorescence emitted which ultimately determines IC<sub>50</sub> values via measurement of fluorescence units at each endpoint (i.e. at each concentration of compound used). The basal fluorescence of the test compounds is subtracted from the measured fluorescence at each concentration point. before calculation of % inhibition and IC<sub>50</sub> value.

### **A typical CYP450 end point assay, for inhibition of CYP1B1**

Regenerating system consists of: 5 µL Solution A (183 mg of NADP<sup>+</sup> + 183 mg of glucose-6-phosphate + 654 µL of 1.0 M magnesium chloride solution + 9.15 mL of sterile

ultra-pure water) + 1  $\mu$ L Solution B (250 Units of glucose-6-phosphate dehydrogenase + 6.25 mL of 5 mM sodium citrate; mixed in a tube and made up to 10 ml with sterile ultra-pure water) + 39  $\mu$ L 0.2 M phosphate buffer (KPi; 0.6 mL of 1.0M K<sub>2</sub>HPO<sub>4</sub> + 9.4 mL of 1.0 M KH<sub>2</sub>PO<sub>4</sub> mixed and made up to 50 mL with sterile ultra-pure water) + 5  $\mu$ L potential inhibitory compound. Enzyme system consists of: 0.5  $\mu$ L CYP1B1 (0.5 pmoles; CYP Design Ltd) + 1.7  $\mu$ L control protein (denatured proteins from yeast cells that do not contain recombinant CYP450 proteins) + 5  $\mu$ L 0.1 mM 7-ER (7-ethoxyresorufin substrate) + 42.8  $\mu$ L 0.1M Kpi (0.3 mL of 1.0 M K<sub>2</sub>HPO<sub>4</sub> + 4.7 mL of 1.0 M KH<sub>2</sub>PO<sub>4</sub> were mixed and made up to 50 mL with sterile ultra-pure water. The assay is performed using (a) sensitivity (Gain): 65/70/75 of the Biotek Synergy plate reader (this would differ from one instrument to the other) and (b) Filter: 530/590 nm that monitors fluorescence excitation/emission of resorufin, the metabolite of 7-ethoxyresorufin substrate (ER); the excitation/emission differs with the substrate that is used. Similar assays were performed with Sacchrosomes™ bearing the other human CYPs using appropriate fluorescent substrates, as detailed above.

#### **Procedure for IC<sub>50</sub> determination using Sacchrosomes™**

The plate reader (BioTek) was warmed at 37 °C. Compounds were serially diluted to six different concentrations with 10% DMSO in a Sero-Wel white microplate. Serial dilutions were made with a dilution factor of 1:20. 45  $\mu$ L of regenerating system was prepared and pre-warmed at 37 °C, as detailed in Table 1.

**Table S1A.** The constitution of the regenerating system used per reaction in each single well for different CYPs was as follows.

| Enzyme | Solution A | Solution B | Inhibitor | KPi buffers      | water      |
|--------|------------|------------|-----------|------------------|------------|
| CYP1A1 | 5 $\mu$ L  | 1 $\mu$ L  | 5 $\mu$ L | 39 $\mu$ L 0.2 M | -          |
| CYP1B1 | 5 $\mu$ L  | 1 $\mu$ L  | 5 $\mu$ L | 39 $\mu$ L 0.2 M | -          |
| CYP1A2 | 5 $\mu$ L  | 1 $\mu$ L  | 5 $\mu$ L | 20 $\mu$ L 0.5 M | 19 $\mu$ L |
| CYP2D6 | 5 $\mu$ L  | 1 $\mu$ L  | 5 $\mu$ L | 25 $\mu$ L 0.2 M | 14 $\mu$ L |

|        |           |           |           |                  |            |
|--------|-----------|-----------|-----------|------------------|------------|
| CYP3A4 | 5 $\mu$ L | 1 $\mu$ L | 5 $\mu$ L | 25 $\mu$ L 0.2 M | 14 $\mu$ L |
|--------|-----------|-----------|-----------|------------------|------------|

Meanwhile, 50  $\mu$ L of enzyme substrate mix reaction was prepared and incubated at 37°C for 10 min (Table 2).

**Table S1B.** The constitution of enzyme-substrate mixtures was as follows.

| Enzyme  | P450 conc. in Sacchrosomes <sup>TM</sup> | Control Microsome | Substrate                 | KPi buffers        | water         |
|---------|------------------------------------------|-------------------|---------------------------|--------------------|---------------|
| CYP1A1  | 0.5 $\mu$ L (0.5 pmole)                  | 2 $\mu$ L         | 5 $\mu$ L 0.1 mM E.R.     | 42.5 $\mu$ L 0.1 M | -             |
| CYP1B1  | 0.5 $\mu$ L (0.5 pmole)                  | 1.7 $\mu$ L       | 5 $\mu$ L 0.1 mM E.R.     | 42.8 $\mu$ L 0.1 M | -             |
| CYP1A2  | 1 $\mu$ L (1 pmole)                      | 1.6 $\mu$ L       | 5 $\mu$ L 320 $\mu$ M CEC | 42.4 $\mu$ L 0.1 M | -             |
| CYP2D6  | 2.5 $\mu$ L (2.5 pmole)                  | 0.4 $\mu$ L       | 0.5 $\mu$ L 2 mM EOMCC    | 25 $\mu$ L 0.2 M   | 21.6 $\mu$ L  |
| CYP2C9  | 1 $\mu$ L (1 pmole)                      | 1.6 $\mu$ L       | 5 $\mu$ L 320 $\mu$ M CEC | 42.4 $\mu$ L 0.1 M | -             |
| CYP2C19 | 1 $\mu$ L (1 pmole)                      | 1.6 $\mu$ L       | 5 $\mu$ L 320 $\mu$ M CEC | 42.4 $\mu$ L 0.1 M | -             |
| CYP3A4  | 1.1 $\mu$ L (1 pmole)                    | 10.102 $\mu$ L    | 0.1 $\mu$ L 2 mM          | 25 $\mu$ L 0.2 M   | 23.96 $\mu$ L |

In wells of a black 96-well flat-bottomed microplate, 45  $\mu$ L of regenerating system, 5  $\mu$ L serial dilutions of inhibitor were pipetted out from the dilution plate and then 50  $\mu$ L of enzyme/substrate was added except in control well (positive control); for this well, instead of inhibitor 5  $\mu$ L of 10% DMSO was added. In the background well (negative control), only 45  $\mu$ L regenerating system and 5  $\mu$ L 10% DMSO were added with no enzyme; the microplate was then vortexed for a few seconds. The microplate was incubated for 10 min. which was followed by addition of 75  $\mu$ L of Tris-acetonitrile to all wells, using an eight-channel multi-pipette, to stop the reaction; after that 50  $\mu$ L of enzyme/substrate reaction was added into the ‘negative control’ well. The plate was left to shake for 10 sec and the fluorescence units for each endpoint were monitored at appropriate settings (for assay parameters and plate layout) selected on the KC4 software of the BioTek plate reader.

### **Calculation of IC<sub>50</sub> values**

To calculate IC<sub>50</sub> values, a series of dose-response data, for example, drug concentrations ( $x_1, x_2, \dots, x_n$ ) at which specific growth inhibition occurs ( $y_1, y_2, \dots, y_n$ ) were generated. The values of  $y$  were in the range of 0-1. The simplest estimate of IC<sub>50</sub> is to plot  $x$ - $y$  and fit the data with a straight line (via linear regression). IC<sub>50</sub> values are then estimated using the fitted line, i.e.

$$Y = a * X + b,$$

$$IC_{50} = (0.5 - b)/a.$$

Raw data was imported and computed in Microsoft Excel. The maximum change in relative fluorescence units (RFU) relative to positive control with 0.5% DMSO was calculated. The enzyme inhibition was plotted using sigmoidal curve (4 parameter variable slope equation) and half inhibitory concentration (IC<sub>50</sub>) values were analysed statistically using Graph-Pad Prism Software (Version 6.0).

### **Transfection of mammalian expression plasmids that encode human *CYP1A1* & *CYP1B1* genes isolated from a human liver cDNA library in HEK293 cells grown in suspension cells**

HEK293 ‘suspension’ cells ( $1 \times 10^6$  per mL), obtained from CYP Design Ltd, were counted using improved Neubauer counting chamber and the cell viability ( $\geq 90\%$  viability) was determined using trypan blue dye exclusion. Actively dividing suspension cells in log phase were seeded in appropriate volumes in Erlenmeyer flask (Corning #431143) and incubated at 37 °C, 8% CO<sub>2</sub> and shaken at 130 rpm on an orbital shaker (Panasonic). Before transfection, all mammalian expression plasmids containing human *CYP* genes (isolated from a human liver cDNA library) were propagated in *E. coli* DH5 $\alpha$ , grown in LB medium in presence of ampicillin (50  $\mu$ g/mL). The endotoxin-free plasmids

were prepared using Zymo PURE™ Plasmid Maxiprep Kit as per manufacturer's instructions (#D4202, Zymo Pure). The quantity and purity of plasmid DNA ( $A_{260/280} \geq 1.9$ ) was determined by Bio Spectrophotometer (Eppendorf). The quality of plasmid DNA was determined using 1% agarose gel electrophoresis.

To initiate transfection, the respective plasmid DNA–cationic lipid complexes were prepared as per manufacturer's instructions (Invitrogen #16447-100) in OptiPRO SFM reduced serum medium (Invitrogen #12309-09). Further, the aseptic preparation of DNA-lipid complexes was added slowly to the respective flasks containing HEK293 suspension cells. The negative control was prepared by adding OptiPRO SFM reduced serum media without plasmid DNA. The suspension cells were incubated at 37 °C 24 to 48 h post transfection, the cells were counted and the cell viability was determined. The transfected cells in sufficient volumes were spun at 200 x g for 5 minutes. The supernatant was discarded and the cells were washed once with pre-warmed phosphate buffered saline. The cells were once again spun at 200 x g for 5 min at room temperature and the supernatant was discarded. The cells were gently re-suspended in pre-warmed growth media to obtain cell density  $\sim 4 \times 10^6$  transfected HEK293 cells per mL.

**Western blot showing levels of expression of CYPs 1A1, 1B1, 1A2, 2D6, 2C9, 2C19, 3A4 measured in recombinant HEK293 cells**

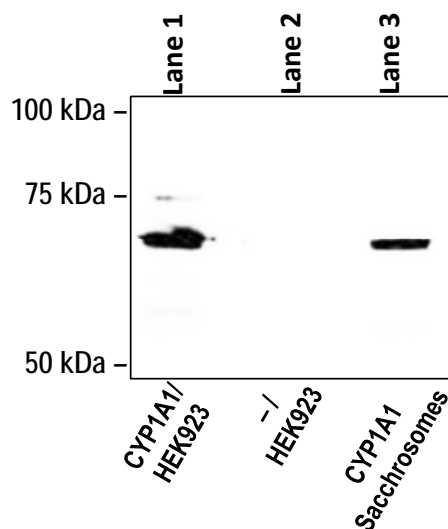

Western blot shows expression of CYP1A1 from the pcDNA3.1 plasmid when transfected in HEK293 cells. The Western blot was probed with a CYP1A1 rabbit polyclonal antibody (Abcam; ab124295). Lane 1, cells which express CYP1A1 from the pcDNA3.1 plasmid; lane 2, cells which contain the empty plasmid pcDNA3.1; lane 3, CYP1A1 Sacchrosomes produced from baker's yeast.

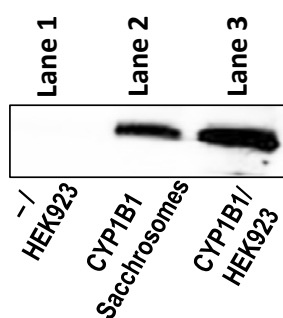

Western blot shows expression of CYP1B1 from the pcDNA3.1 plasmid when transfected in HEK293 cells. The Western blot was probed with a CYP1B1 rabbit polyclonal antibody (Abcam; ab32649). Lane 1,  $1 \times 10^7$  cells which contain the empty plasmid pcDNA3.1; lane 2, 0.5 pmole CYP1B1 Sacchrosomes produced from baker's yeast; lane 3,  $1 \times 10^7$  cells which express CYP1B1 from the pcDNA3.1 plasmid.

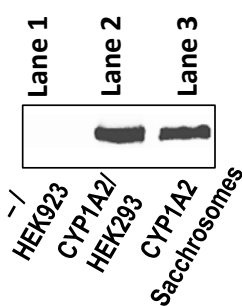

Western blot shows expression of CYP1A2 from the pcDNA3.1 plasmid when transfected in HEK293 cells. The Western blot was probed with a CYP1A2 rabbit polyclonal antibody (Abcam; ab22717). Lane 1,  $1 \times 10^7$  cells which contain the empty plasmid pcDNA3.1; lane 2,  $1 \times 10^7$  cells which express CYP1A2 from the pcDNA3.1 plasmid; lane 3, 0.5 pmole CYP1A2 Sacchrosomes produced from baker's yeast.



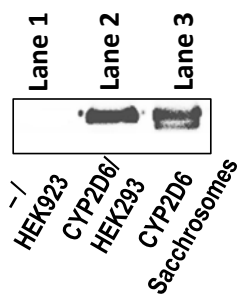

Western blot shows expression of CYP2D6 from the pcDNA3.1 plasmid when transfected in HEK293 cells. The Western blot was probed with a CYP2D6 rabbit polyclonal antibody (Abcam; ab62204). Lane 1,  $1 \times 10^7$  cells which contain the empty plasmid pcDNA3.1; lane 2,  $1 \times 10^7$  cells which express CYP2D6 from the pcDNA3.1 plasmid; lane 3, 0.5 pmole CYP2D6 Sacchrosomes produced from baker's yeast.

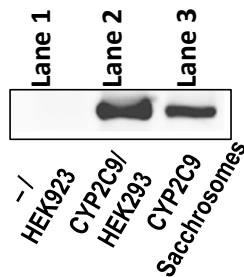

Western blot shows expression of CYP2C9 from the pcDNA3.1 plasmid when transfected in HEK293 cells. The Western blot was probed with a CYP2C9 rabbit polyclonal antibody (Abcam; ab4236). Lane 1,  $1 \times 10^7$  cells which contain the empty plasmid pcDNA3.1; lane 2,  $1 \times 10^7$  cells which express CYP2C9 from the pcDNA3.1 plasmid; lane 3, 0.5 pmole CYP2C9 Sacchrosomes produced from baker's yeast.

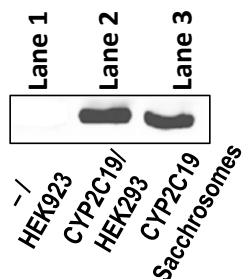

Western blot shows expression of CYP2C19 from the pcDNA3.1 plasmid when transfected in HEK293 cells. The Western blot was probed with a CYP2C19 rabbit polyclonal antibody (Abcam; ab137015). Lane 1,  $1 \times 10^7$  cells which contain the empty plasmid pcDNA3.1; lane 2,  $1 \times 10^7$  cells which express CYP2C19 from the pcDNA3.1 plasmid; lane 3, 0.5 pmole CYP2C19 Sacchrosomes produced from baker's yeast.

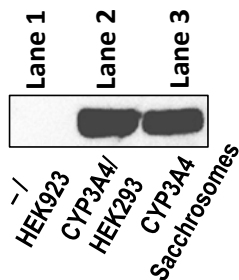

Western blot shows expression of CYP3A4 from the pcDNA3.1 plasmid when transfected in HEK293 cells. The Western blot was probed with a CYP3A4 rabbit polyclonal antibody (Abcam; ab3572). Lane 1,  $1 \times 10^7$  cells which contain the empty plasmid pcDNA3.1; lane 2,  $1 \times 10^7$  cells which express CYP3A4 from the pcDNA3.1 plasmid; lane 3, 1.0 pmole CYP3A4 Sacchrosomes produced from baker's yeast.

**S2. Table S1.** CYP1A1 screening results in Sacchrosomes™<sup>a</sup>

| S. N. | Structure                                                                           | Codes   | Mol. Wt. | % CYP1A1 Inhibition at 10 $\mu$ M |
|-------|-------------------------------------------------------------------------------------|---------|----------|-----------------------------------|
| 1     | 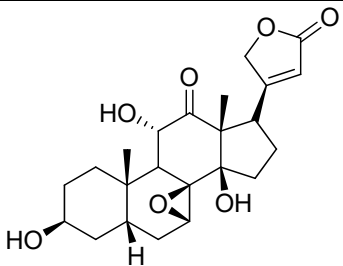   | IN00001 | 418.48   | 23.1                              |
| 2     |    | IN00002 | 470.60   | 11                                |
| 3     |   | IN00003 | 470.60   | 17                                |
| 4     |  | IN00004 | 470.60   | 49.8                              |
| 5     |  | IN00005 | 492.47   | 14                                |

|    |                                                                                     |         |        |               |
|----|-------------------------------------------------------------------------------------|---------|--------|---------------|
| 6  | 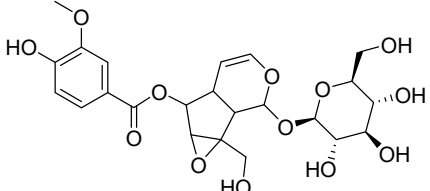   | IN00006 | 512.46 | 17            |
| 7  |    | IN00007 | 302.24 | 40            |
| 8  |    | IN00008 | 354.31 | No inhibition |
| 9  |   | IN00009 | 456.70 | 19            |
| 10 |  | IN00010 | 498.74 | 6.6           |
| 11 |  | IN00011 | 512.72 | 5             |
| 12 |  | IN00012 | 470.68 | 7             |

|    |                                                                                     |         |        |      |
|----|-------------------------------------------------------------------------------------|---------|--------|------|
| 13 | 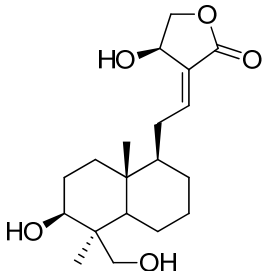   | IN00013 | 338.44 | 12.5 |
| 14 |    | IN00014 | 480.59 | 10.9 |
| 15 |   | IN00015 | 332.43 | 7.7  |
| 16 |  | IN00016 | 302.47 | 1    |
| 17 |  | IN00018 | 256.38 | 7    |
| 18 |  | IN00019 | 186.16 | 68.7 |
| 19 |  | IN00020 | 186.16 | 80   |

|    |                                                                                                          |         |        |               |
|----|----------------------------------------------------------------------------------------------------------|---------|--------|---------------|
| 20 | 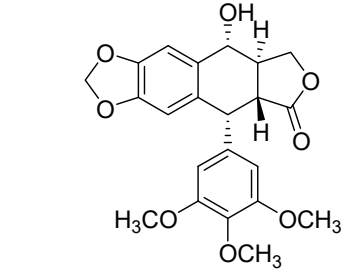 <p>Podophyllotoxin</p> | IN00021 | 414.41 | 5.1           |
| 21 |                         | IN00022 | 400.38 | No inhibition |
| 22 |                        | IN00023 | 507.2  | 2             |
| 23 |                       | IN00024 | 426.40 | 5             |
| 24 |                       | IN00025 | 495.48 | No inhibition |

|    |                                                                                     |         |        |   |
|----|-------------------------------------------------------------------------------------|---------|--------|---|
| 25 | 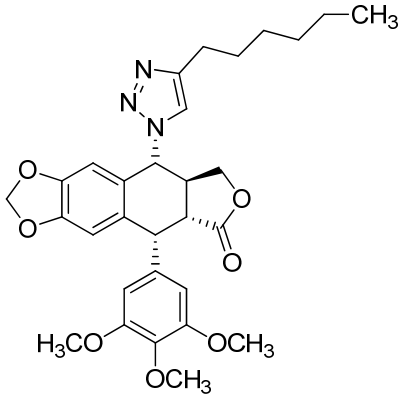   | IN00026 | 549.61 | 8 |
| 26 |   | IN00027 | 549.61 | 5 |
| 27 |  | IN00038 | 535.59 | 6 |
| 28 |  | IN00039 | 166.17 | 4 |

|                 |                                                                                                  |         |        |      |
|-----------------|--------------------------------------------------------------------------------------------------|---------|--------|------|
| 29              | 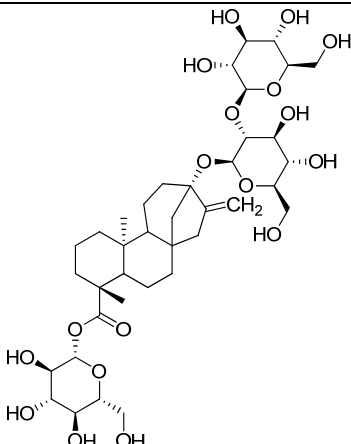                | IN00040 | 804.87 | 33.9 |
| 30              |                | IN00041 | 967.01 | 10.6 |
| 31              |               | IN00042 | 432.38 | 3    |
| 32              | <br>Gluo      | IN00043 | 161.13 | 2    |
| 33 <sup>b</sup> | <br>Scoparone | IN00044 | 206.19 | 2    |
| 34              |               | IN00045 | 291.39 | 5    |
| 35              |               | IN00046 | 356.37 | 14   |

|    |                                                                                     |         |        |               |
|----|-------------------------------------------------------------------------------------|---------|--------|---------------|
| 36 | 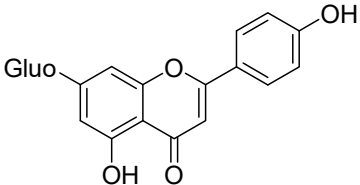   | IN00047 | 253.23 | 19            |
| 37 |    | IN00048 | 188.23 | 19            |
| 38 |    | IN00049 | 432.38 | 42            |
| 39 |    | IN00050 | 399.44 | 9             |
| 40 |   | IN00051 | 286.08 | 11            |
| 41 |  | IN00052 | 178.14 | No inhibition |
| 42 |  | IN00053 | 624.59 | No inhibition |
| 43 |  | IN00054 | 260.33 | No inhibition |



|    |  |         |        |               |
|----|--|---------|--------|---------------|
| 44 |  | IN00055 | 610.52 | 7.7           |
| 45 |  | IN00056 | 448.38 | No inhibition |
| 46 |  | IN00057 | 192.26 | No inhibition |
| 47 |  | IN00068 | 248.36 | 6.2           |
| 48 |  | IN00069 | 348.0  | 70.7          |
| 49 |  | IN00070 | 488.58 | No inhibition |
| 50 |  | IN00071 | 174.20 | 8             |

|    |                                                                                     |         |        |               |
|----|-------------------------------------------------------------------------------------|---------|--------|---------------|
| 51 | 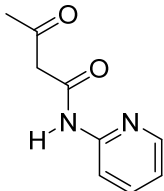   | IN00072 | 178.19 | No inhibition |
| 52 |    | IN00073 | 174.20 | 7             |
| 53 |    | IN00074 | 192.21 | 2             |
| 54 |    | IN00075 | 194.19 | No inhibition |
| 55 |   | IN00076 | 192.21 | No inhibition |
| 56 |  | IN00077 | 192.21 | No inhibition |
| 57 |  | IN00078 | 174.20 | No inhibition |
| 58 |  | IN00079 | 192.21 | 5             |
| 59 |  | IN00080 | 174.20 | No inhibition |

|    |                                                                                                   |         |        |               |
|----|---------------------------------------------------------------------------------------------------|---------|--------|---------------|
| 60 | 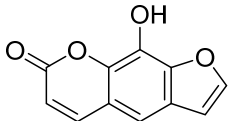                 | IN00081 | 202.16 | 20            |
| 61 |                  | IN00082 | 272.25 | 9             |
| 62 |                  | IN00083 | 197.2  | No inhibition |
| 63 | <br>Racemic form | IN00084 | 286.28 | 56            |
| 64 |                 | IN00085 | 228.24 | 3             |
| 65 |                | IN00086 | 385.41 | 1.4           |
| 66 | <br>Sphondin   | IN00087 | 216.19 | 67            |
| 67 |                | IN00088 | 216.19 | 68            |
| 68 |                | IN00089 | 246.30 | No inhibition |

|    |                                                                                     |         |        |               |
|----|-------------------------------------------------------------------------------------|---------|--------|---------------|
| 69 | 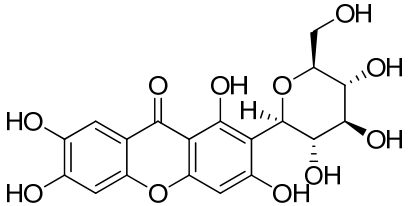   | IN00090 | 422.34 | No inhibition |
| 70 |    | IN00091 | 352.43 | 3             |
| 71 |    | IN00092 | 620.8  | 30            |
| 72 |   | IN00093 | 426.49 | 2.6           |
| 73 |  | IN00094 | 355.43 | No inhibition |
| 74 |  | IN00095 | 176.21 | No inhibition |
| 75 |  | IN00096 | 252.69 | No inhibition |
| 76 |  | IN00097 | 278.30 | No inhibition |
| 77 |  | IN00098 | 250.29 | 2             |

|    |                                                                                                     |         |        |               |
|----|-----------------------------------------------------------------------------------------------------|---------|--------|---------------|
| 78 | 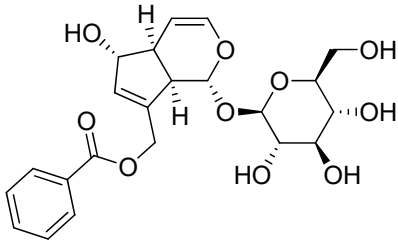                   | IN00099 | 450.44 | No inhibition |
| 79 |                    | IN00100 | 494.49 | No inhibition |
| 80 |                    | IN00101 | 286.24 | 30            |
| 81 |                   | IN00102 | 285.34 | 44            |
| 82 |                  | IN00103 | 312.32 | 20            |
| 83 |                  | IN00104 | 332.39 | 2             |
| 84 |                  | IN00105 | 164.16 | No inhibition |
| 85 | <br>Racemic form | IN00106 | 482.44 | 5             |

|    |                                                                                     |         |        |               |
|----|-------------------------------------------------------------------------------------|---------|--------|---------------|
| 86 | 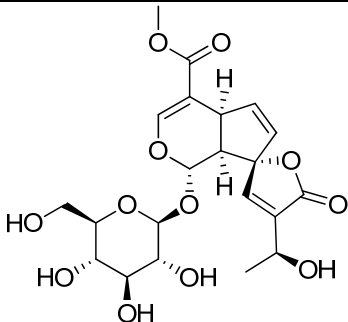   | IN00107 | 470.42 | No inhibition |
| 87 |    | IN00108 | 270.28 | 7             |
| 88 |    | IN00109 | 372.82 | 48            |
| 89 |   | IN00110 | 384.36 | No inhibition |
| 90 |  | IN00111 | 296.27 | 41            |
| 91 |  | IN00112 | 486.60 | No inhibition |
| 92 |  | IN00113 | 216.19 | 84            |
| 93 |  | IN00114 | 188.18 | 48            |

|    |                                                                                     |         |        |               |
|----|-------------------------------------------------------------------------------------|---------|--------|---------------|
| 94 | 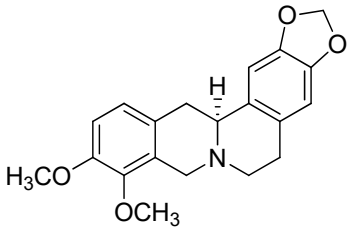   | IN00115 | 339.34 | No inhibition |
| 95 |    | IN00116 | 627.86 | No inhibition |
| 96 |   | IN00117 | 685.89 | No inhibition |
| 97 |  | IN00118 | 655.87 | 2             |

|     |                                                                                     |         |        |               |
|-----|-------------------------------------------------------------------------------------|---------|--------|---------------|
| 98  | 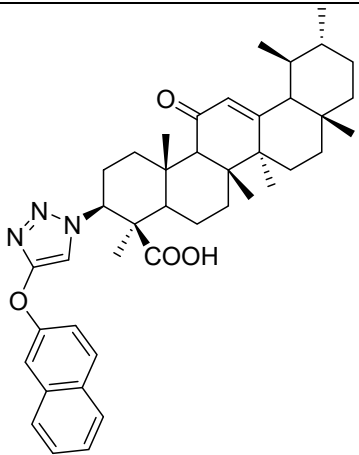   | IN00119 | 663.89 | 4.8           |
| 99  |   | IN00120 | 673.93 | No inhibition |
| 100 |  | IN00121 | 615.82 | 2             |
| 101 |  | IN00122 | 615.82 | No inhibition |



|     |                                                                                     |         |        |               |
|-----|-------------------------------------------------------------------------------------|---------|--------|---------------|
| 102 | 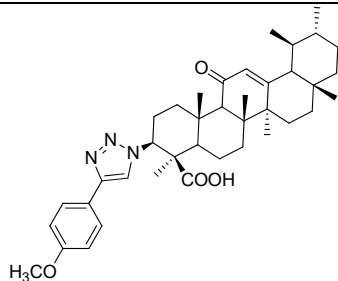   | IN00123 | 627.86 | No inhibition |
| 103 |    | IN00124 | 633.81 | No inhibition |
| 104 |   | IN00125 | 601.86 | 6             |
| 104 |  | IN00126 | 655.87 | 2             |
| 105 |  | IN00127 | 526.75 | 4             |
| 106 |  | IN00128 | 568.83 | 3             |

|     |                                                                                     |          |        |               |
|-----|-------------------------------------------------------------------------------------|----------|--------|---------------|
| 107 | 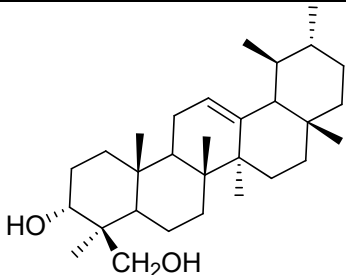   | IN00129  | 442.72 | No inhibition |
| 108 |    | IN000130 | 484.36 | No inhibition |
| 109 |   | IN00131  | 526.79 | No inhibition |
| 110 |  | IN00132  | 512.76 | 1             |
| 111 |  | IN00133  | 227.26 | 70            |
| 112 |  | IN00134  | 276.13 | 55            |
| 113 |  | IN00135  | 240.30 | 7             |
| 114 |  | IN00136  | 257.28 | 83            |

|     |                                                                                     |         |        |               |
|-----|-------------------------------------------------------------------------------------|---------|--------|---------------|
| 115 | 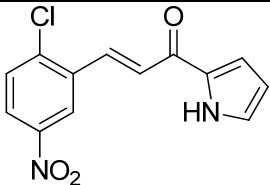   | IN00137 | 277.68 | 15            |
| 116 |    | IN00138 | 231.68 | 34            |
| 117 |    | IN00139 | 227.26 | 25            |
| 118 |    | IN00140 | 257.28 | 66            |
| 119 |    | IN00141 | 241.24 | 93            |
| 120 |   | IN00142 | 368.38 | 14            |
| 121 |  | IN00144 | 584.57 | No inhibition |
| 122 |  | IN00145 | 538.50 | No inhibition |
| 123 |  | IN00146 | 248.32 | 4             |

|     |  |         |        |               |
|-----|--|---------|--------|---------------|
| 124 |  | IN00147 | 298.37 | No inhibition |
| 125 |  | IN00148 | 348.9  | 11.5          |
| 126 |  | IN00149 | 608.68 | 3.2           |
| 127 |  | IN00150 | 328.32 | 27            |
| 128 |  | IN00151 | 330.29 | No inhibition |
| 129 |  | IN00152 | 329.33 | 37.5          |
| 130 |  | IN00153 | 352.22 | 69            |
| 131 |  | IN00154 | 284.31 | 76            |

|     |                                                                                     |         |        |    |
|-----|-------------------------------------------------------------------------------------|---------|--------|----|
| 132 | 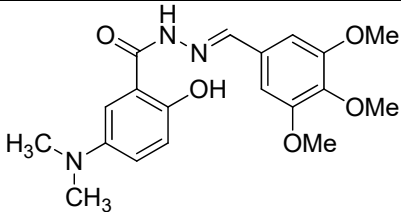   | IN00155 | 373.40 | 57 |
| 133 |    | IN00156 | 289.35 | 65 |
| 134 |    | IN00157 | 327.33 | 12 |
| 135 |   | IN00158 | 272.30 | 80 |
| 136 |  | IN00159 | 388.26 | 76 |
| 137 |  | IN00160 | 261.32 | 48 |
| 138 |  | IN00161 | 383.44 | 35 |

|     |                                                                                     |         |        |               |
|-----|-------------------------------------------------------------------------------------|---------|--------|---------------|
| 139 | 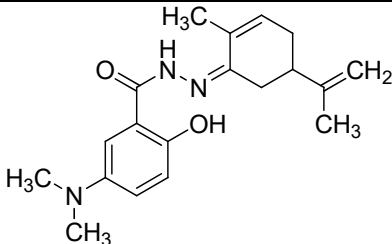   | IN00162 | 327.42 | 56            |
| 140 |    | IN00163 | 284.31 | 75            |
| 141 |    | IN00164 | 289.37 | 36            |
| 142 |   | IN00165 | 333.38 | 7             |
| 143 |  | IN00166 | 416.38 | No inhibition |
| 144 |  | IN00167 | 306.40 | No inhibition |
| 145 |  | IN00168 | 288.34 | No inhibition |
| 146 |  | IN00169 | 266.76 | No inhibition |

|     |                                                                                     |         |        |               |
|-----|-------------------------------------------------------------------------------------|---------|--------|---------------|
| 147 | 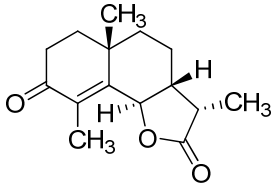   | IN00170 | 248.32 | No inhibition |
| 148 |    | IN00171 | 246.30 | No inhibition |
| 149 |    | IN00173 | 635.87 | No inhibition |
| 150 |   | IN00174 | 649.90 | 5.9           |
| 151 |  | IN00175 | 180.16 | No inhibition |
| 152 |  | IN00177 | 329.44 | 84            |
| 153 |  | IN00178 | 275.35 | 28            |

|     |                                                                                     |         |        |               |
|-----|-------------------------------------------------------------------------------------|---------|--------|---------------|
| 154 | 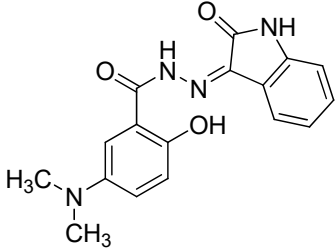   | IN00179 | 324.33 | 35            |
| 155 |    | IN00180 | 289.37 | 1             |
| 156 |    | IN00181 | 273.33 | 10            |
| 157 |    | IN00182 | 301.38 | No inhibition |
| 158 |    | IN00183 | 275.34 | 7             |
| 159 |   | IN00184 | 301.34 | No inhibition |
| 160 |  | IN00185 | 301.38 | 4             |
| 161 |  | IN00186 | 247.29 | No inhibition |
| 162 |  | IN00187 | 170.12 | 45            |
| 163 |  | IN00188 | 198.22 | No inhibition |



|     |                                                                                                               |         |        |               |
|-----|---------------------------------------------------------------------------------------------------------------|---------|--------|---------------|
| 164 | 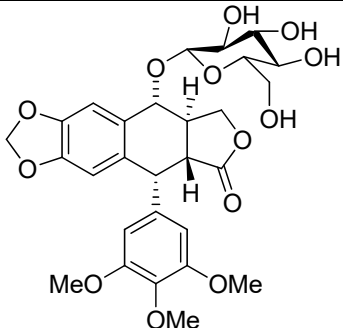                             | IN00189 | 576.55 | No inhibition |
| 165 |  <p>Picropodophyllotoxin</p> | IN00190 | 414.41 | 2             |
| 166 |                             | IN00191 | 302.19 | No inhibition |
| 167 |                            | IN00192 | 194.18 | No inhibition |
| 168 |                            | IN00193 | 364.80 | No inhibition |
| 169 |                            | IN00194 | 338.40 | 52            |
| 170 |                            | IN00195 | 294.30 | 97            |
| 170 |                            | IN00196 | 192.21 | 2             |

|     |                                                                                     |         |        |               |
|-----|-------------------------------------------------------------------------------------|---------|--------|---------------|
| 171 | 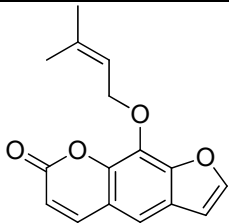   | IN00197 | 270.28 | 71.4          |
| 172 |    | IN00198 | 258.27 | 7             |
| 173 |    | IN00199 | 302.45 | 92            |
| 174 |    | IN00200 | 214.26 | No inhibition |
| 175 |   | IN00201 | 286.28 | No inhibition |
| 176 |  | IN00202 | 314.38 | 22            |
| 17  |  | IN00203 | 244.29 | 33            |
| 177 |  | IN00204 | 290.29 | 15            |

|     |                                                                                     |         |        |               |
|-----|-------------------------------------------------------------------------------------|---------|--------|---------------|
| 178 | 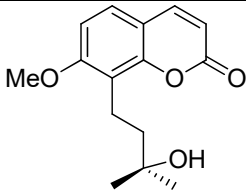   | IN00205 | 262.30 | 18.2          |
| 179 |    | IN00206 | 362.33 | No inhibition |
| 180 |    | IN00207 | 822.93 | No inhibition |
| 181 |  | IN00208 | 496.19 | No inhibition |
| 182 |  | IN00209 | 540.25 | No inhibition |
| 183 |  | IN00210 | 486.24 | No inhibition |

|     |                                                                                                 |         |        |               |
|-----|-------------------------------------------------------------------------------------------------|---------|--------|---------------|
| 184 | 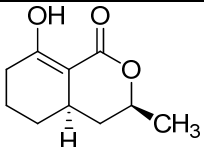               | IN00211 | 182.22 | No inhibition |
| 185 |                | IN00212 | 140.14 | No inhibition |
| 186 | <br>Papaverine | IN00213 | 339.39 | 9.5           |
| 187 |                | IN00214 | 300.26 | 86            |
| 188 |               | IN00215 | 218.33 | No inhibition |
| 189 |              | IN00216 | 259.26 | 27            |
| 190 |              | IN00217 | 222.37 | 11.3          |
| 191 |              | IN00218 | 468.75 | No inhibition |

|     |                                                                                     |         |        |               |
|-----|-------------------------------------------------------------------------------------|---------|--------|---------------|
| 192 | 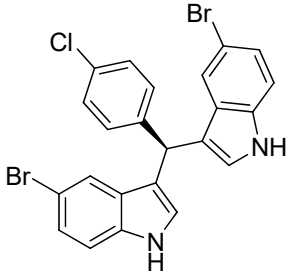   | IN00219 | 514.64 | 3             |
| 193 |    | IN00220 | 589.12 | No inhibition |
| 194 |    | IN00221 | 633.81 | No inhibition |
| 195 |   | IN00222 | 456.70 | 2.8           |
| 196 |  | IN00223 | 398.66 | 2             |
| 197 |  | IN00224 | 426.72 | 7             |
| 198 |  | IN00225 | 408.53 | No inhibition |

|     |                                                                                                                                                                              |         |        |               |
|-----|------------------------------------------------------------------------------------------------------------------------------------------------------------------------------|---------|--------|---------------|
| 199 | 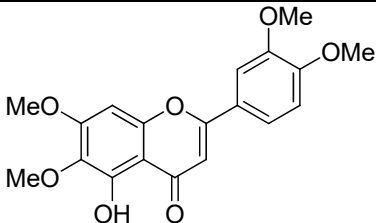<br><chem>COc1cc(OC)c(O)c2c(c1)oc(cc22)c3cc(OC)c(OC)cc3</chem>                              | IN00226 | 360.36 | 80            |
| 200 | <br><chem>CC1=C(C)C(=C)C(=O)OCC1OC(=O)C</chem>                                              | IN00227 | 330.42 | No inhibition |
| 201 | <br><chem>COc1ccc2c(c1)oc3cc(OC)ccc32</chem>                                                | IN00228 | 231.25 | No inhibition |
| 202 | <br><chem>COc1ccc2c(c1)c3cc(OC)c(NC)cc3c2c4cc5cc6c(c4)OCO6</chem>                           | IN00229 | 379.41 | 90            |
| 203 | <br><chem>COc1ccc2c(c1)n3cc(OC)oc3o2</chem>                                                | IN00230 | 229.25 | 17            |
| 204 | <br><chem>Oc1ccc(cc1)C2=NC(=C3C=CC=N3)O2</chem>                                           | IN00231 | 240.26 | No inhibition |
| 205 | <br><chem>CC(C)C(=O)Cc1cc(OC)c(OC)c2c1oc(=O)c2=O</chem>                                   | IN00232 | 290.31 | No inhibition |
| 206 | <br><chem>COc1cc(OC)c2c(c1)oc(=O)c2C3=CC(=C(C4C=CC(=C4)C5C(=C(C(=C5)OC)OC)OC)OC)C3</chem> | IN00233 | 544.59 | No inhibition |

|                  |                                                                                                  |         |        |               |
|------------------|--------------------------------------------------------------------------------------------------|---------|--------|---------------|
| 207              | 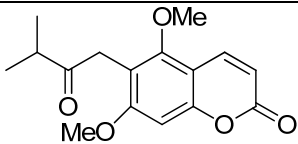                | IN00234 | 290.31 | No inhibition |
| 208              |                 | IN00235 | 330.33 | 3.7           |
| 209 <sup>c</sup> | <br>Coumurrayin | IN00236 | 274.31 | 3             |
| 210              |                | IN00237 | 288.30 | No inhibition |
| 211              |               | IN00238 | 246.26 | 17            |
| 212              |               | IN00239 | 290.31 | No inhibition |
| 213              |               | IN00240 | 274.31 | 6.4           |
| 214              |               | IN00241 | 426.72 | No inhibition |

|     |                                                                                                     |         |         |               |
|-----|-----------------------------------------------------------------------------------------------------|---------|---------|---------------|
| 215 | 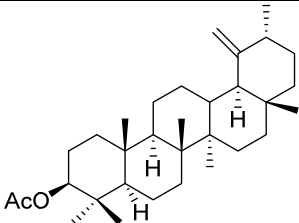                   | IN00242 | 468.75  | No inhibition |
| 216 |                    | IN00243 | 1105.26 | No inhibition |
| 217 |                    | IN00244 | 154.21  | No inhibition |
| 218 |                    | IN00245 | 178.14  | No inhibition |
| 219 |                   | IN00246 | 202.16  | No inhibition |
| 220 |                  | IN00247 | 304.29  | 72            |
| 221 | <br>Isobergapten | IN00248 | 216.19  | No inhibition |
| 222 |                  | IN00249 | 386.40  | 1             |
| 223 |                  | IN00250 | 262.26  | No inhibition |



|     |                                                                                                      |         |        |               |
|-----|------------------------------------------------------------------------------------------------------|---------|--------|---------------|
| 224 | 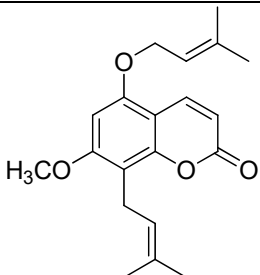 <p>Sesibiricin</p> | IN00251 | 328.40 | 1.6           |
| 225 |                     | IN00252 | 162.14 | 5             |
| 226 |                     | IN00253 | 270.24 | 16            |
| 227 |                    | IN00254 | 394.37 | No inhibition |
| 228 |                   | IN00255 | 418.39 | No inhibition |
| 229 |                   | IN00256 | 250.33 | No inhibition |
| 230 |                   | IN00257 | 367.35 | 7             |
| 231 |                   | IN00258 | 293.36 | 2             |

|     |                                                                                     |         |        |               |
|-----|-------------------------------------------------------------------------------------|---------|--------|---------------|
| 232 | 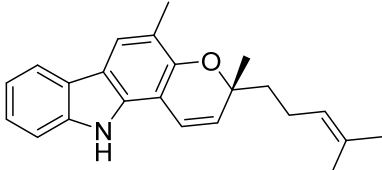   | IN00259 | 331.45 | 10            |
| 233 |    | IN00260 | 388.37 | 32            |
| 234 |    | IN00261 | 448.38 | No inhibition |
| 235 |   | IN00262 | 596.53 | No inhibition |
| 236 |  | IN00263 | 446.50 | No inhibition |
| 237 |  | IN00264 | 529.37 | No inhibition |
| 238 |  | IN00265 | 543.40 | No inhibition |

|     |                                                                                     |         |        |               |
|-----|-------------------------------------------------------------------------------------|---------|--------|---------------|
| 239 | 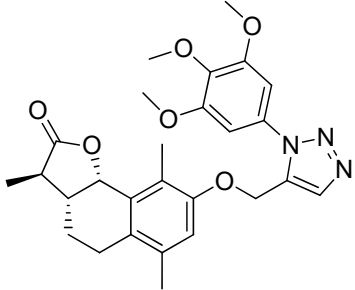   | IN00266 | 493.55 | No inhibition |
| 240 |    | IN00267 | 518.35 | No inhibition |
| 241 |   | IN00268 | 526.42 | No inhibition |
| 242 |  | IN00269 | 421.46 | No inhibition |
| 243 |  | IN00270 | 438.91 | 1             |
| 244 |  | IN00271 | 530.39 | No inhibition |

|                  |                                                                                                       |         |        |               |
|------------------|-------------------------------------------------------------------------------------------------------|---------|--------|---------------|
| 245              | 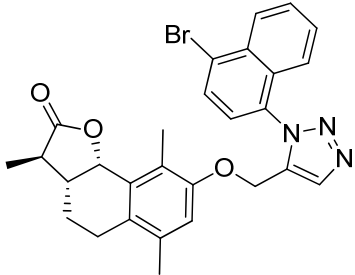                     | IN00272 | 532.43 | No inhibition |
| 246              |                      | IN00273 | 471.47 | 3             |
| 247              |                      | IN00276 | 359.59 | No inhibition |
| 248              |                     | IN00279 | 456.79 | 2.8           |
| 249 <sup>d</sup> | <br>Betulin        | IN00280 | 442.72 | 7             |
| 250 <sup>e</sup> | <br>Betulinic acid | IN00281 | 456.70 | 0             |

|     |                                                                                     |         |        |               |
|-----|-------------------------------------------------------------------------------------|---------|--------|---------------|
| 251 | 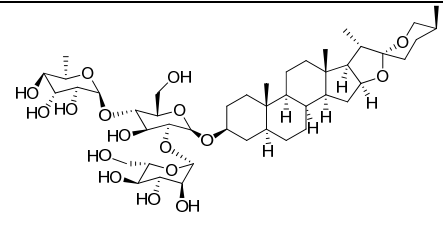   | IN00282 | 889.03 | No inhibition |
| 252 |    | IN00283 | 413.64 | 9.5           |
| 253 |    | IN00284 | 474.37 | 16            |
| 254 |    | IN00285 | 272.30 | 33            |
| 255 |   | IN00286 | 248.71 | No inhibition |
| 256 |  | IN00287 | 140.09 | No inhibition |
| 257 |  | IN00288 | 368.47 | No inhibition |
| 258 |  | IN00289 | 352.43 | No inhibition |
| 259 |  | IN00290 | 232.23 | No inhibition |

|     |                                                                                     |         |        |               |
|-----|-------------------------------------------------------------------------------------|---------|--------|---------------|
| 260 | 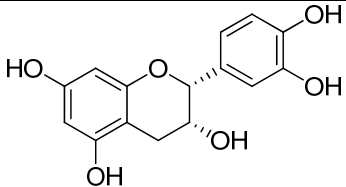   | IN00292 | 290.27 | No inhibition |
| 261 |    | IN00293 | 324.37 | 34            |
| 262 |    | IN00294 | 338.40 | No inhibition |
| 263 |    | IN00295 | 268.26 | No inhibition |
| 264 |   | IN00296 | 328.27 | No inhibition |
| 265 |  | IN00297 | 256.25 | No inhibition |
| 266 |  | IN00298 | 338.40 | No inhibition |
| 267 |  | IN00299 | 294.30 | 85            |
| 268 |  | IN00300 | 142.11 | No inhibition |

|                  |                                                                                                   |         |        |               |
|------------------|---------------------------------------------------------------------------------------------------|---------|--------|---------------|
| 269              | 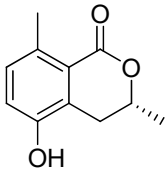                 | IN00301 | 192.21 | No inhibition |
| 270              |                  | IN00302 | 286.41 | No inhibition |
| 271              | <br>2HCl         | IN00303 | 553.56 | No inhibition |
| 272              |                  | IN00304 | 228.24 | No inhibition |
| 273 <sup>c</sup> | <br>Coumurrayin | IN00305 | 274.31 | 3             |
| 274              | <br>Sesebrinol | IN00306 | 362.42 | 21            |
| 275              |                | IN00307 | 308.33 | No inhibition |

|     |                                                                                     |         |        |               |
|-----|-------------------------------------------------------------------------------------|---------|--------|---------------|
| 276 | 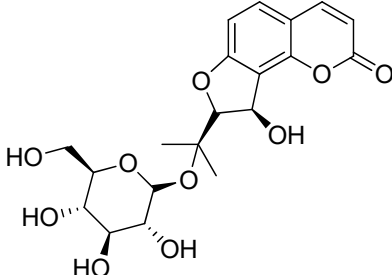   | IN00308 | 424.40 | No inhibition |
| 277 |    | IN00309 | 300.31 | 97            |
| 278 |    | IN00310 | 258.27 | 69            |
| 279 |   | IN00311 | 380.48 | No inhibition |
| 280 |  | IN00312 | 410.12 | No inhibition |
| 281 |  | IN00313 | 273.33 | 11            |



|     |                                                                                     |         |        |               |
|-----|-------------------------------------------------------------------------------------|---------|--------|---------------|
| 282 | 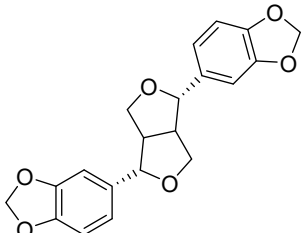   | IN00314 | 354.35 | No inhibition |
| 283 |    | IN00315 | 383.52 | 3             |
| 284 |    | IN00316 | 416.42 | No inhibition |
| 285 |   | IN00317 | 272.25 | No inhibition |
| 286 |  | IN00318 | 370.40 | No inhibition |
| 287 |  | IN00319 | 342.28 | 12            |
| 288 |  | IN00321 | 368.43 | No inhibition |

|                  |                                                                                                         |         |        |               |
|------------------|---------------------------------------------------------------------------------------------------------|---------|--------|---------------|
| 289 <sup>d</sup> | 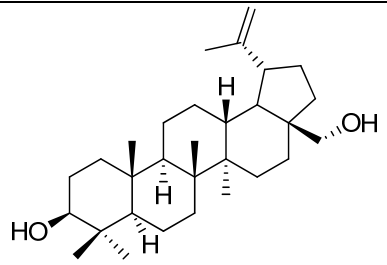 <p>Betulin</p>        | IN00322 | 442.72 | 5.9           |
| 290              |                        | IN00323 | 496.76 | No inhibition |
| 291 <sup>e</sup> |  <p>Betulinic acid</p> | IN00324 | 456.70 | No inhibition |
| 292              |                      | IN00325 | 498.74 | No inhibition |
| 293              |                      | IN00328 | 358.34 | No inhibition |
| 294              |                      | IN00329 | 390.38 | No inhibition |

|     |                                                                                     |         |        |               |
|-----|-------------------------------------------------------------------------------------|---------|--------|---------------|
| 295 | 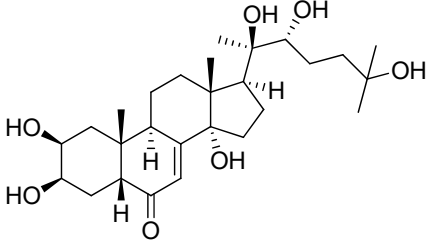   | IN00330 | 480.63 | 3             |
| 296 |    | IN00331 | 504.48 | No inhibition |
| 297 |    | IN00332 | 210.23 | 38            |
| 298 |   | IN00333 | 289.13 | 50            |
| 299 |  | IN00336 | 632.83 | No inhibition |
| 300 |  | IN00337 | 380.44 | No inhibition |

|     |                                                                                                                   |         |        |               |
|-----|-------------------------------------------------------------------------------------------------------------------|---------|--------|---------------|
| 301 | 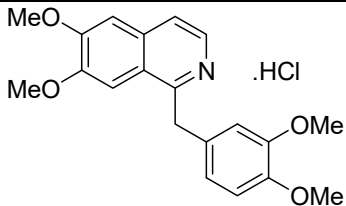 <p>Papaverine Hydrochloride</p> | IN00338 | 375.12 | 9             |
| 302 |                                  | IN00339 | 398.49 | 8             |
| 303 |                                  | IN00340 | 297.35 | No inhibition |
| 304 |                                  | IN00341 | 356.46 | No inhibition |
| 305 |                                 | IN00343 | 228.24 | 28            |
| 306 |                                | IN00344 | 602.80 | 18            |
| 307 |                                | IN00345 | 602.80 | 10            |

|     |                                                                                     |         |        |               |
|-----|-------------------------------------------------------------------------------------|---------|--------|---------------|
| 308 | 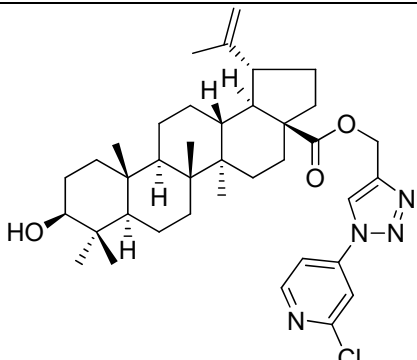   | IN00346 | 649.31 | No inhibition |
| 309 |    | IN00348 | 657.88 | No inhibition |
| 310 |   | IN00349 | 643.90 | No inhibition |
| 311 |  | IN00350 | 631.86 | No inhibition |

|     |                                                                                     |         |        |               |
|-----|-------------------------------------------------------------------------------------|---------|--------|---------------|
| 312 | 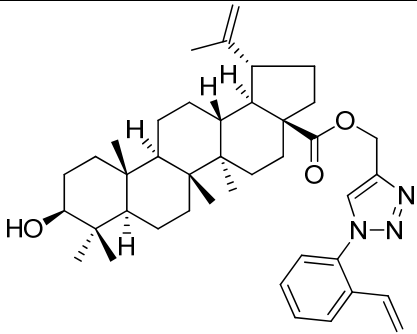   | IN00351 | 639.91 | No inhibition |
| 313 |    | IN00352 | 692.77 | 17.5          |
| 314 |   | IN00353 | 728.75 | No inhibition |
| 315 |  | IN00354 | 613.87 | No inhibition |
| 316 |  | IN00355 | 739.77 | No inhibition |

|     |                                                                                     |         |        |               |
|-----|-------------------------------------------------------------------------------------|---------|--------|---------------|
| 317 | 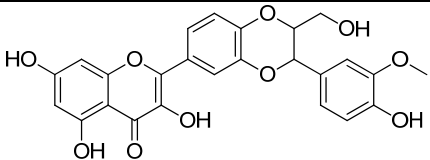   | IN00357 | 478.45 | 36            |
| 318 |    | IN00358 | 230.26 | No inhibition |
| 319 |    | IN00359 | 516.54 | No inhibition |
| 320 |   | IN00360 | 266.33 | No inhibition |
| 321 |  | IN00361 | 280.36 | No inhibition |
| 322 |  | IN00362 | 244.29 | 10            |
| 323 |  | IN00363 | 230.22 | 89            |

|     |                                                                                     |         |        |               |
|-----|-------------------------------------------------------------------------------------|---------|--------|---------------|
| 324 | 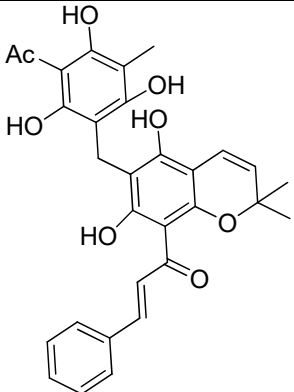   | IN00364 | 516.54 | 27            |
| 325 |    | IN00365 | 382.51 | 2             |
| 326 |   | IN00369 | 703.95 | 3             |
| 327 |  | IN00371 | 693.96 | No inhibition |
| 328 |  | IN00372 | 659.88 | No inhibition |



|     |                                                                                     |         |        |               |
|-----|-------------------------------------------------------------------------------------|---------|--------|---------------|
| 329 | 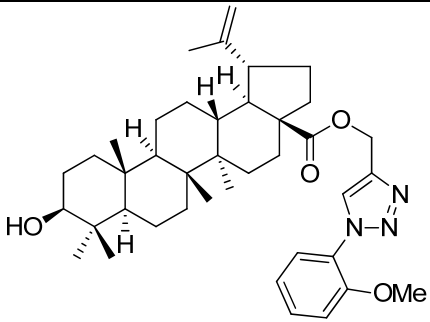   | IN00373 | 643.90 | No inhibition |
| 330 |    | IN00374 | 740.79 | No inhibition |
| 331 |   | IN00375 | 495.75 | No inhibition |
| 332 |  | IN00378 | 546.82 | 9.9           |
| 333 |  | IN00380 | 494.75 | No inhibition |

|     |                                                                                     |         |        |               |
|-----|-------------------------------------------------------------------------------------|---------|--------|---------------|
| 334 | 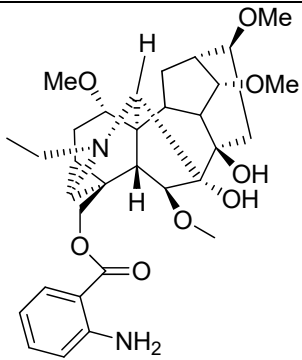   | IN00386 | 586.72 | 1             |
| 335 |    | IN00389 | 710.91 | No inhibition |
| 336 |   | IN00390 | 875.06 | No inhibition |
| 337 |  | IN00391 | 818.3  | No inhibition |
| 338 |  | IN00392 | 887.82 | No inhibition |
| 339 |  | IN00393 | 851.94 | 6.9           |

|     |                                                                                     |         |         |               |
|-----|-------------------------------------------------------------------------------------|---------|---------|---------------|
| 340 | 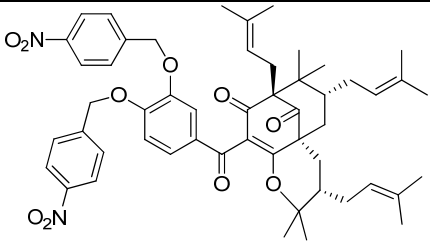   | IN00394 | 875.6   | 13.1          |
| 341 |    | IN00395 | 875.6   | No inhibition |
| 342 |    | IN00397 | 1034.25 | 15.3          |
| 343 |   | IN00399 | 727.37  | No inhibition |
| 344 |  | IN00401 | 887.92  | 5.5           |
| 345 |  | IN00416 | 190.15  | 99.6          |

|     |                                                                                     |         |        |      |
|-----|-------------------------------------------------------------------------------------|---------|--------|------|
| 346 | 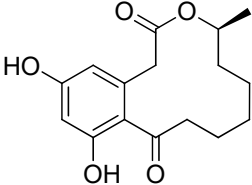   | IN00417 | 292.33 | 2.7  |
| 347 |    | IN00419 | 290.31 | 14.7 |
| 348 |    | IN00420 | 322.33 | 24.7 |
| 349 |    | IN00421 | 610.56 | 3.9  |
| 350 |   | IN00423 | 280.36 | 8.9  |
| 351 |  | IN00424 | 354.40 | 34.6 |
| 352 |  | IN00425 | 336.34 | 14.9 |
| 353 |  | IN00426 | 354.40 | 15   |

|     |  |         |        |               |
|-----|--|---------|--------|---------------|
| 354 |  | IN00431 | 392.49 | 24.9          |
| 355 |  | IN00432 | 306.3  | No inhibition |
| 356 |  | IN00436 | 452.54 | 8.3           |
| 357 |  | IN00437 | 403.86 | No inhibition |
| 358 |  | IN00438 | 440.53 | 3             |

|     |                                                                                     |         |        |               |
|-----|-------------------------------------------------------------------------------------|---------|--------|---------------|
| 359 | 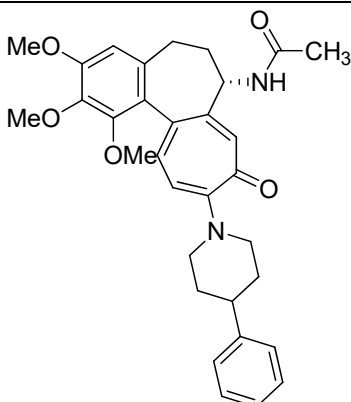   | IN00443 | 528.64 | 9.6           |
| 360 |    | IN00444 | 468.54 | 8.9           |
| 361 |   | IN00445 | 438.52 | 12            |
| 362 |  | IN00447 | 384.43 | 15.2          |
| 363 |  | IN00448 | 480.34 | No inhibition |

|     |                                                                                     |         |        |               |
|-----|-------------------------------------------------------------------------------------|---------|--------|---------------|
| 364 | 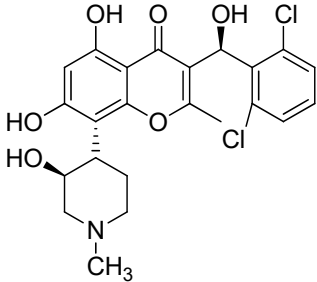   | IN00449 | 480.34 | 3.4           |
| 365 |    | IN00450 | 490.34 | 52.8          |
| 366 |   | IN00452 | 445.89 | 23.2          |
| 367 |  | IN00453 | 429.44 | No inhibition |
| 368 |  | IN00454 | 456.45 | No inhibition |
| 369 |  | IN00455 | 427.88 | 2.4           |

|                  |                                                                                                |         |        |      |
|------------------|------------------------------------------------------------------------------------------------|---------|--------|------|
| 370              | 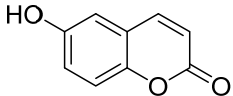              | IN00456 | 162.14 | 6.2  |
| 371              |               | IN00457 | 146.14 | 3.5  |
| 372              |               | IN00458 | 162.14 | 4.7  |
| 373 <sup>b</sup> | <br>Scoparone | IN00459 | 206.19 | 6.7  |
| 374              |               | IN00471 | 426.72 | 8.4  |
| 375              |              | IN00475 | 246.22 | 70.8 |
| 376              |             | IN00476 | 202.21 | 24.3 |
| 377              |             | IN00477 | 254.24 | 10   |
| 378              |             | IN00478 | 204.22 | 10.3 |
| 379              |             | IN00480 | 288.04 | 4.4  |



|     |                                                                                                                      |         |        |      |
|-----|----------------------------------------------------------------------------------------------------------------------|---------|--------|------|
| 380 | 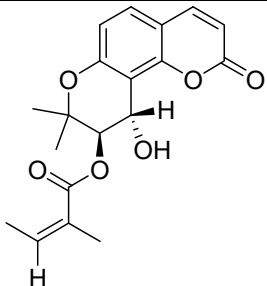 <p>3'-Angeloyl-cis-khellactone</p> | IN00482 | 344.36 | 3.3  |
| 381 |                                     | IN00485 | 206.3  | 17.4 |
| 382 |                                     | IN00488 | 298.30 | 31.5 |
| 383 |                                    | IN00492 | 638.57 | 11.5 |
| 384 |                                   | IN00495 | 600.61 | 30.6 |
| 385 |                                   | IN00497 | 548.54 | 22.1 |
| 386 |                                   | IN00498 | 360.31 | 31.3 |
| 387 |                                   | IN00499 | 390.38 | 6.3  |
| 388 |                                   | IN00500 | 374.34 | 33.3 |

|     |                                                                                     |         |        |               |
|-----|-------------------------------------------------------------------------------------|---------|--------|---------------|
| 389 | 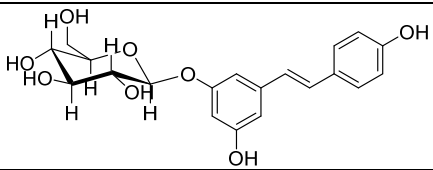   | IN00502 | 390.38 | 1.1           |
| 390 |    | IN00503 | 246.30 | 4.8           |
| 391 |    | IN00504 | 172.18 | No inhibition |
| 392 |    | IN00505 | 172.18 | 8.89          |
| 393 |   | IN00506 | 230.26 | 9.1           |
| 394 |  | IN00507 | 263.2  | No inhibition |

<sup>a</sup>This repository consists of natural products, plus semi-synthetic derivatives along with few synthetic small molecules.

<sup>b</sup>IN0044 and IN00459 codes belong to the same compound 'scoparone'. These were submitted two times to the IIIM NP repository, therefore have two different codes. They differ from each other only in terms of their purity. IN0044 is 88% pure whereas IN00459 is 92% pure.

<sup>c</sup>IN00236 and IN00305 codes belong to the same compound 'coumurrayin'. These were submitted two times to the IIIM NP repository, therefore have two different codes. They differ from each other only in terms of their purity. IN00236 is 92% pure whereas IN00305 is 95% pure.

<sup>d</sup>IN00280 and IN00322 codes belong to the same compound 'betulin'. These were submitted two times to the IIIM NP repository, therefore have two different codes. They differ from each other only in terms of their purity. IN00280 is 94% pure whereas IN00322 is 98% pure.

IN00281 and IN00324 codes belong to the same compound 'betulinic acid'. These were submitted two times to the IIIM NP repository, therefore have two different codes. They differ from each other only in terms of their purity. IN00280 is 92% pure whereas IN00322 is 96% pure.

### **S3. HPLC purity of In-house natural product library hits.**

**S3.1.** Bergapten (IN-88) HPLC purity: 95.91%.

HPLC method:

|              |                                                                                                             |
|--------------|-------------------------------------------------------------------------------------------------------------|
| Mobile Phase | 1% Acetic acid in Water (A), Methanol (B), gradient<br>Time 0.01 5 35 40 50 55<br>B (%) 10 10 100 100 10 10 |
| Flow rate    | 0.7 ml/min.                                                                                                 |
| Column       | Chromolith RP-18 ( Merck, 5um, 4x250mm.)                                                                    |
| Column Temp. | 30 degree                                                                                                   |
| Stop time    | 55 min.                                                                                                     |
| wavelength   | 254 nm.                                                                                                     |

Data File C:\CHEM32\1\DATA\BDG 10-06-10\10-06-10-BDG 2010-06-10 17-56-22\BDG000016.D  
Sample Name: Bergapten

```

=====
Acq. Operator   : R.K.GUPTA                      Seq. Line :   15
Acq. Instrument : Instrument 1                    Location  : Vial 13
Injection Date  : 6/11/2010 8:43:55 AM           Inj       :    1
                                           Inj Volume: 10 µl
Acq. Method     : C:\Chem32\1\DATA\BDG 10-06-10\10-06-10-BDG 2010-06-10 17-56-22\RKGM
Last changed    : 6/10/2010 5:55:20 PM by R.K.GUPTA
Analysis Method : C:\CHEM32\1\METHODS\S-3.M
Last changed    : 6/11/2010 1:00:28 PM by R.K.GUPTA
                  (modified after loading)
Sample Info     : Methanol (B),1.0% acetic acid in water (A), Column RP-1
                  8 (E-Merck, 5µm,4.0 x 250 mm ), column temp. 30 degree,
                  Flow rate 0.7 ml/min.
Time            0.01    5.0    35    40    50    55
B(%)            10      10    100   100   10    10
=====

```

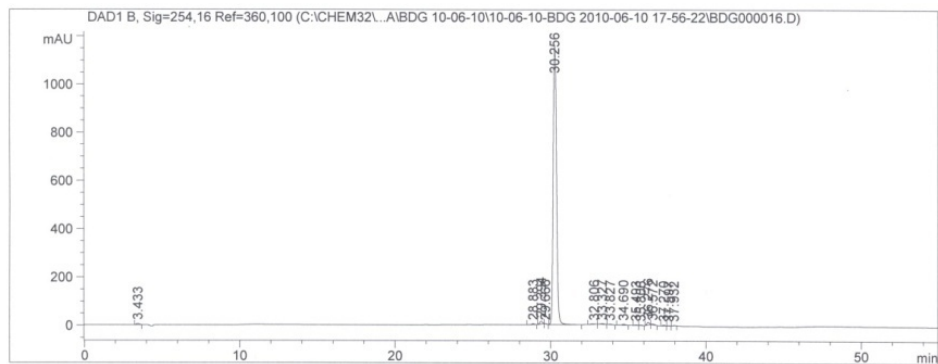

#### Area Percent Report

```

=====
Sorted By      :      Signal
Multiplier     :      1.0000
Dilution       :      1.0000
Use Multiplier & Dilution Factor with ISTDs
=====

```

Signal 1: DAD1 B, Sig=254,16 Ref=360,100

| Peak # | RetTime [min] | Type | Width [min] | Area [mAU*s] | Height [mAU] | Area %  |
|--------|---------------|------|-------------|--------------|--------------|---------|
| 1      | 3.433         | BB   | 0.2157      | 72.91894     | 5.39506      | 0.4067  |
| 2      | 28.883        | BB   | 0.2006      | 54.06482     | 4.18695      | 0.3015  |
| 3      | 29.394        | BB   | 0.1890      | 140.57851    | 12.33149     | 0.7840  |
| 4      | 29.666        | BB   | 0.1574      | 16.08510     | 1.68494      | 0.0897  |
| 5      | 30.256        | BB   | 0.2377      | 1.71978e4    | 1155.05298   | 95.9134 |
| 6      | 32.806        | BB   | 0.3462      | 43.86551     | 1.68214      | 0.2446  |
| 7      | 33.327        | BB   | 0.2754      | 50.43184     | 2.92155      | 0.2813  |
| 8      | 33.827        | BB   | 0.2255      | 27.36444     | 1.90579      | 0.1526  |

Instrument 1 6/11/2010 1:03:01 PM R.K.GUPTA

Page 1 of 2

Data File C:\CHEM32\1\DATA\BDG 10-06-10\10-06-10-BDG 2010-06-10 17-56-22\BDG000016.D  
Sample Name: Bergapten

| Peak<br># | RetTime<br>[min] | Type | Width<br>[min] | Area<br>[mAU*s] | Height<br>[mAU] | Area<br>% |
|-----------|------------------|------|----------------|-----------------|-----------------|-----------|
| 9         | 34.690           | BB   | 0.2547         | 65.64255        | 3.97375         | 0.3661    |
| 10        | 35.493           | BB   | 0.1767         | 20.66164        | 1.93366         | 0.1152    |
| 11        | 35.806           | BB   | 0.1710         | 21.60582        | 2.11805         | 0.1205    |
| 12        | 36.276           | BB   | 0.1791         | 111.67329       | 10.41345        | 0.6228    |
| 13        | 36.572           | BB   | 0.1959         | 40.02814        | 3.24607         | 0.2232    |
| 14        | 37.270           | BB   | 0.1762         | 34.78351        | 3.26784         | 0.1940    |
| 15        | 37.597           | BB   | 0.1651         | 12.62341        | 1.30183         | 0.0704    |
| 16        | 37.932           | BB   | 0.1743         | 20.42071        | 1.98019         | 0.1139    |

Totals : 1.79305e4 1213.39574

\*\*\* End of Report \*\*\*

**S3.2 Plumbagin (IN-114) HPLC purity: 96.55%.**

HPLC Method:

|              |                                                                                              |
|--------------|----------------------------------------------------------------------------------------------|
| Mobile Phase | Methanol(B), 1% Acetic acid in water<br>Time 0.01 5 35 40 50 55<br>B (%) 10 10 100 100 10 10 |
| Flow rate    | 0.7 ml/min.                                                                                  |
| Column       | Chromolith RP-18 ( Merck, 5um, 4x250mm.)                                                     |
| Column Temp. | 30 degree                                                                                    |
| Stop time    | 55 min.                                                                                      |
| wavelength   | 254 nm.                                                                                      |

Data File C:\CHEM32\1\DATA\BDG- 22-07-10\22-07-10 BDG 2010-07-22 17-00-45\BDG000002.D  
Sample Name: Plumbagin

```
=====
Acq. Operator   : R.K.GUPTA                      Seq. Line :    2
Acq. Instrument : Instrument 1                    Location  : Vial 41
Injection Date  : 7/22/2010 6:29:09 PM           Inj       :    1
                                                Inj Volume: 10 µl
Acq. Method     : C:\Chem32\1\DATA\BDG- 22-07-10\22-07-10 BDG 2010-07-22 17-00-45\BDG.M
Last changed    : 7/22/2010 5:00:43 PM by R.K.GUPTA
Analysis Method : C:\CHEM32\1\DATA\SKK 9-12-09\9-12-09 SKK 2009-12-09 16-18-45\SKK000001.D\DA.M (KKG.M)
Last changed    : 7/21/2010 10:09:50 AM by R.K.GUPTA
                  (modified after loading)
Sample Info     : Methanol (B) , 1.0% Acetic Acid in Water ,Chromolith R
                  P-18e(Merck 100 -4.6 ), Column temp. 30 degree, Flow rate 0.7 ml/min.
Time: 0.01      5       35      40      50      55
B%      10      10     100     100      10      10
=====
```

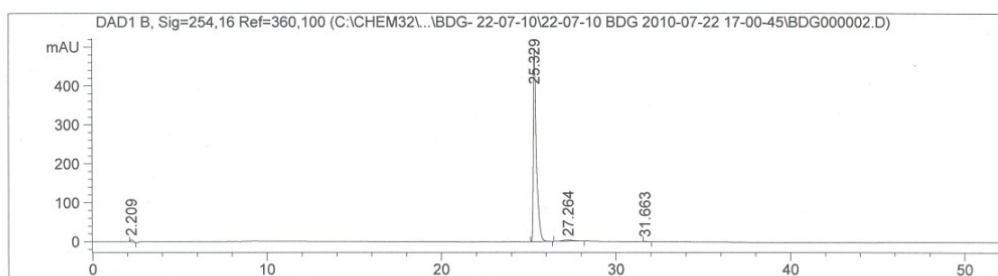

# Area Percent Report

```
=====
Sorted By      :      Signal
Multiplier     :      1.0000
Dilution       :      1.0000
Use Multiplier & Dilution Factor with ISTDs
=====
```

Signal 1: DAD1 B, Sig=254,16 Ref=360,100

| Peak # | RetTime [min] | Type | Width [min] | Area [mAU*s] | Height [mAU] | Area %  |
|--------|---------------|------|-------------|--------------|--------------|---------|
| 1      | 2.209         | BB   | 0.1788      | 57.26671     | 4.95758      | 0.9398  |
| 2      | 25.329        | BB   | 0.1675      | 5883.11719   | 499.06235    | 96.5513 |
| 3      | 27.264        | BB   | 0.5945      | 142.01895    | 3.10014      | 2.3308  |
| 4      | 31.663        | BB   | 0.1151      | 10.85110     | 1.33154      | 0.1781  |

Totals : 6093.25395 508.45162

\*\*\* End of Report \*\*\*



### S3.3. Karanjin (IN-195) HPLC purity : 90%

HPLC Method:

|              |                                          |      |    |     |     |    |    |
|--------------|------------------------------------------|------|----|-----|-----|----|----|
| Mobile Phase | Methanol(B), 1% Acetic acid in water     |      |    |     |     |    |    |
|              | Time                                     | 0.01 | 5  | 35  | 40  | 50 | 55 |
|              | B (%)                                    | 10   | 10 | 100 | 100 | 10 | 10 |
| Flow rate    | 0.7 ml/min.                              |      |    |     |     |    |    |
| Column       | Chromolith RP-18 ( Merck, 5um, 4x250mm.) |      |    |     |     |    |    |
| Column Temp. | 30 degree                                |      |    |     |     |    |    |
| Stop time    | 55 min.                                  |      |    |     |     |    |    |
| wavelength   | 254 nm.                                  |      |    |     |     |    |    |

Data File C:\CHEM32\1\DATA\SJ 25-02-11\25-02-11 SJ 2011-02-25 15-20-11\SJ000003.D  
Sample Name: Karanjin

```

=====
Acq. Operator   : R.K.Gupta                      Seq. Line :    3
Acq. Instrument : Instrument 1                    Location  : Vial 72
Injection Date  : 2/25/2011 5:45:36 PM           Inj       :    1
                                           Inj Volume: 5 µl
Acq. Method     : C:\Chem32\1\DATA\SJ 25-02-11\25-02-11 SJ 2011-02-25 15-20-11\KKG-2.M
Last changed    : 2/25/2011 3:20:07 PM by R.K.Gupta
Analysis Method : C:\CHEM32\1\DATA\BS-AT\BS24-02-11 2011-02-24 16-30-40\PD0000002.D\DA.M (
BS-125GRAD.M)
Last changed    : 2/28/2011 12:07:56 PM by Baljinder Singh
(modified after loading)
Sample Info     : Acetonitrile (B), Water (A), Column RP-18e (e- Merck, c
romolith, 4.6 x 100 mm ), Column temp. 30 degree, Flow
rate 0.8 ml/min.
Time           : 0.01    5      35      40      50      55
B(%)           : 10      10     100     100     10      10

```

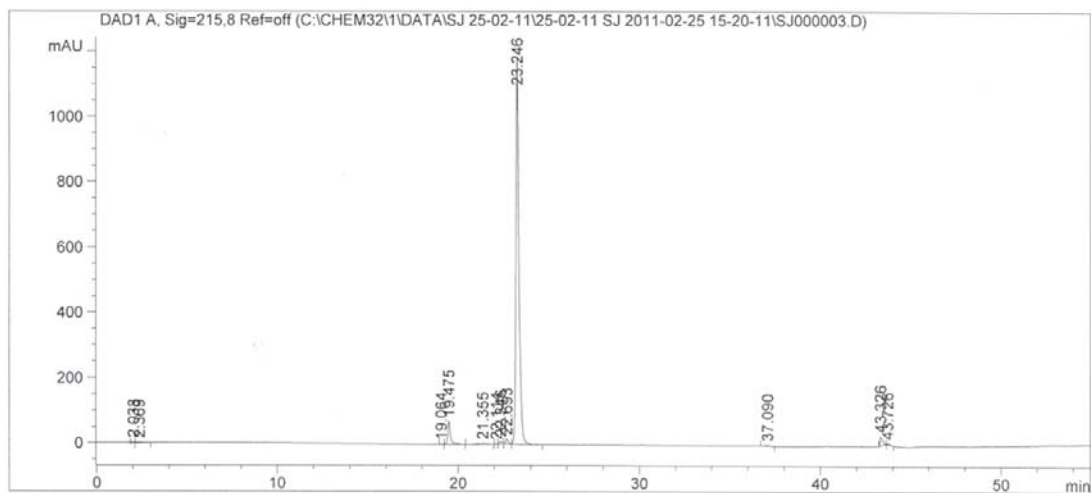

#### Area Percent Report

```

=====
Sorted By      :      Signal
Multiplier     :      1.0000
Dilution       :      1.0000
Use Multiplier & Dilution Factor with ISTDs

```

Signal 1: DAD1 A, Sig=215,8 Ref=off

| Peak # | RetTime [min] | Type | Width [min] | Area [mAU*s] | Height [mAU] | Area % |
|--------|---------------|------|-------------|--------------|--------------|--------|
| 1      | 2.038         | BB   | 0.1498      | 61.96481     | 5.57096      | 0.4100 |
| 2      | 2.369         | BB   | 0.2901      | 73.66037     | 3.18190      | 0.4874 |
| 3      | 19.064        | BB   | 0.1115      | 9.98880      | 1.42938      | 0.0661 |
| 4      | 19.475        | BB   | 0.1473      | 712.07123    | 70.80613     | 4.7115 |

Instrument 1 2/28/2011 12:09:29 PM Baljinder Singh

Page 1 of 2

Data File C:\CHEM32\1\DATA\SJ 25-02-11\25-02-11 SJ 2011-02-25 15-20-11\SJ000003.D  
Sample Name: Karanjin

| Peak<br># | RetTime<br>[min] | Type | Width<br>[min] | Area<br>[mAU*s] | Height<br>[mAU] | Area<br>% |
|-----------|------------------|------|----------------|-----------------|-----------------|-----------|
| 5         | 21.355           | BB   | 0.5600         | 103.80831       | 2.27632         | 0.6869    |
| 6         | 22.114           | BB   | 0.1037         | 7.07097         | 1.11869         | 0.0468    |
| 7         | 22.346           | BB   | 0.1224         | 65.77806        | 8.48544         | 0.4352    |
| 8         | 22.693           | BB   | 0.1332         | 125.49791       | 14.18733        | 0.8304    |
| 9         | 23.246           | BB   | 0.1675         | 1.35961e4       | 1187.95898      | 89.9598   |
| 10        | 37.090           | BB   | 0.3092         | 42.82722        | 2.07185         | 0.2834    |
| 11        | 43.326           | BB   | 0.1434         | 294.11215       | 28.25551        | 1.9460    |
| 12        | 43.726           | BB   | 0.1175         | 20.64273        | 2.57646         | 0.1366    |

Totals : 1.51135e4 1327.91897

\*\*\* End of Report \*\*\*

**S3.4. Khellin (IN-199) HPLC purity : 99.05%**

HPLC Method:

|              |                                          |      |    |     |     |    |    |
|--------------|------------------------------------------|------|----|-----|-----|----|----|
| Mobile Phase | Methanol(B), 1% Acetic acid in water     |      |    |     |     |    |    |
|              | Time                                     | 0.01 | 5  | 35  | 40  | 50 | 55 |
|              | B (%)                                    | 10   | 10 | 100 | 100 | 10 | 10 |
| Flow rate    | 0.7 ml/min.                              |      |    |     |     |    |    |
| Column       | Chromolith RP-18 ( Merck, 5um, 4x250mm.) |      |    |     |     |    |    |
| Column Temp. | 30 degree                                |      |    |     |     |    |    |
| Stop time    | 60 min.                                  |      |    |     |     |    |    |
| wavelength   | 254 nm.                                  |      |    |     |     |    |    |

Data File C:\CHEM32\1\DATA\SKK 15-03-11\15-03-11 SK 2011-03-15 16-48-41\SKK000010.D  
Sample Name: Khellin

```
=====
Acq. Operator   : R.K.Gupta                      Seq. Line :   10
Acq. Instrument : Instrument 1                    Location  : Vial 7
Injection Date  : 3/16/2011 2:17:58 AM            Inj       :    1
                                                Inj Volume: 10 µl

Different Inj Volume from Sequence !    Actual Inj Volume : 5 µl
Acq. Method     : C:\Chem32\1\DATA\SKK 15-03-11\15-03-11 SK 2011-03-15 16-48-41\KKG-2.M
Last changed    : 3/15/2011 4:47:05 PM by R.K.Gupta
Analysis Method : C:\CHEM32\1\METHODS\KKG-2.M
Last changed    : 3/16/2011 12:30:07 PM by R.K.Gupta
                  (modified after loading)
Sample Info     : Methanol(B):Water(A), Column RP-18(E-Merck,Chromolith,4.
                  6x100mm), Column temp. 30 c degree Flow rate 0.8ml/min
Time: 0.01      5        40        45        55        60
B(%):   10       10      100       100       10       10
=====
```

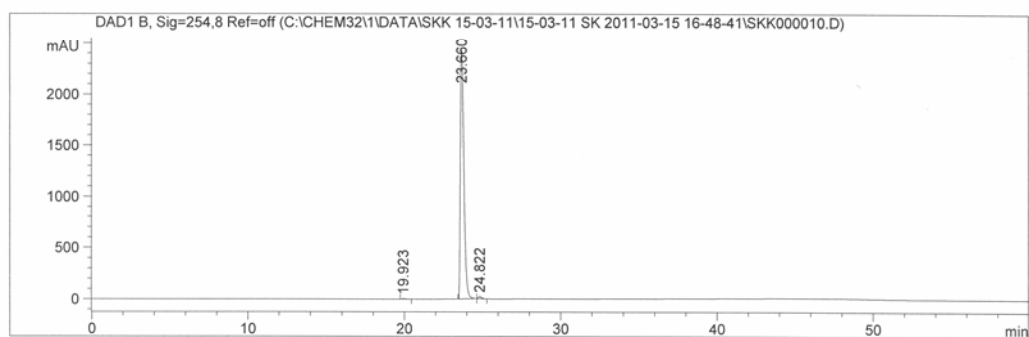

=====  
Area Percent Report  
=====

Sorted By : Signal  
Multiplier : 1.0000  
Dilution : 1.0000  
Use Multiplier & Dilution Factor with ISTDs

Signal 1: DAD1 B, Sig=254,8 Ref=off

| Peak # | RetTime [min] | Type | Width [min] | Area [mAU*s] | Height [mAU] | Area %  |
|--------|---------------|------|-------------|--------------|--------------|---------|
| 1      | 19.923        | BB   | 0.1696      | 59.10330     | 5.08640      | 0.1527  |
| 2      | 23.660        | BB   | 0.2443      | 3.83388e4    | 2427.37646   | 99.0595 |
| 3      | 24.822        | BB   | 0.2072      | 304.90768    | 22.34360     | 0.7878  |

Totals : 3.87028e4 2454.80646

=====  
\*\*\* End of Report \*\*\*

### S3.5. Anisomalin (IN-226) HPTLC % purity : 87.53%.

HPTLC Method:

|               |                                    |
|---------------|------------------------------------|
| Mobile Phase  | CHCl <sub>3</sub> : Methanol (9:1) |
| wavelength    | 500 nm.                            |
| Spray reagent | Cerric ammonium sulphate           |

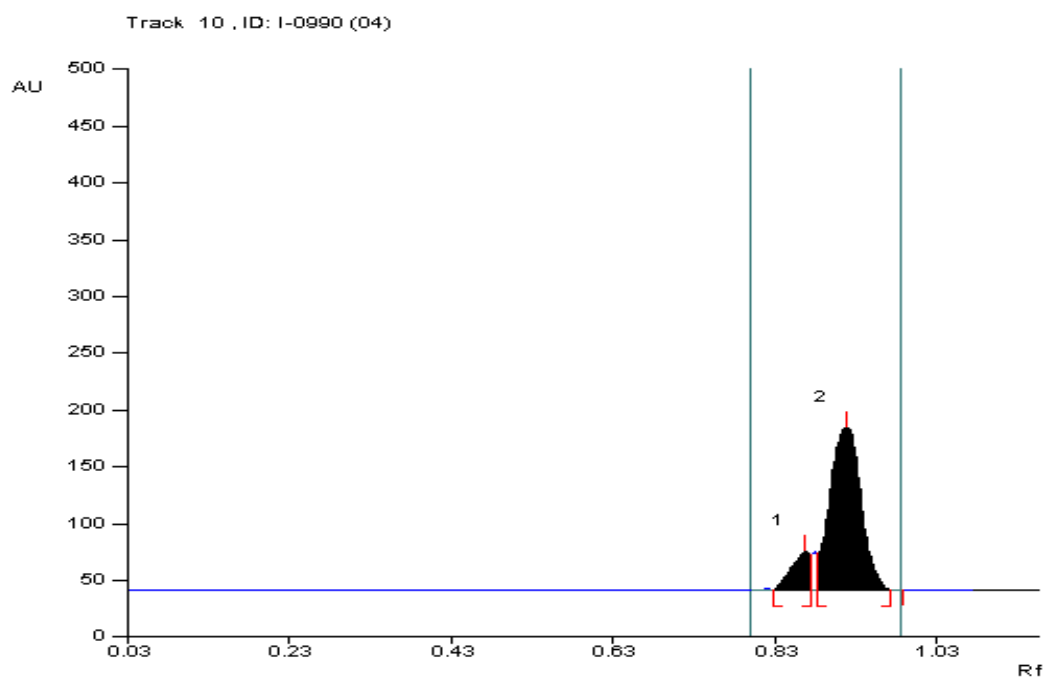

| Peak | Start Position | Start Height | Max Position | Max Height | Max %   | End Position | End Height | Area      | Area %  | Assi |
|------|----------------|--------------|--------------|------------|---------|--------------|------------|-----------|---------|------|
| 1    | 0.83 Rf        | 0.2 AU       | 0.87 Rf      | 35.1 AU    | 19.60 % | 0.88 Rf      | 31.1 AU    | 563.2 AU  | 12.47 % |      |
| 2    | 0.88 Rf        | 33.1 AU      | 0.92 Rf      | 143.9 AU   | 80.40 % | 0.97 Rf      | 0.3 AU     | 3952.1 AU | 87.53 % |      |

**S3.6. 6-methoxy dihydrochelerythrine (IN-229) HPTLC purity: 93.77%.**

HPTLC Method:

|               |                                         |
|---------------|-----------------------------------------|
| Mobile Phase  | <b>CHCl<sub>3</sub>: Methanol (9:1)</b> |
| wavelength    | 500 nm.                                 |
| Spray reagent | Dragendorff's reagent                   |

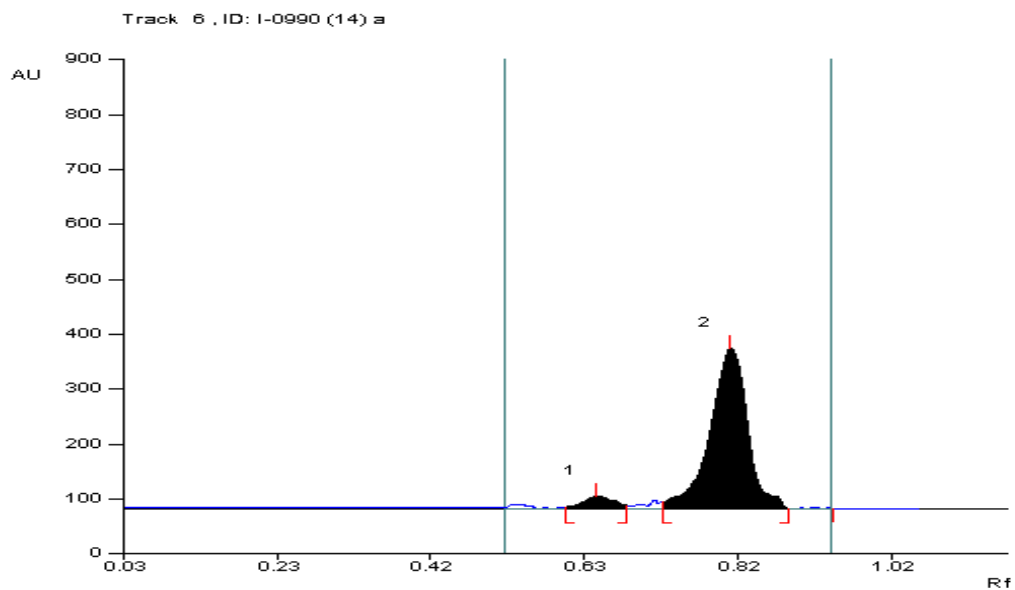

| Peak | Start Position | Start Height | Max Position | Max Height | Max %   | End Position | End Height | Area       | Area %  | As: |
|------|----------------|--------------|--------------|------------|---------|--------------|------------|------------|---------|-----|
| 1    | 0.60 Rf        | 2.4 AU       | 0.64 Rf      | 22.6 AU    | 7.17 %  | 0.68 Rf      | 6.2 AU     | 859.2 AU   | 6.23 %  |     |
| 2    | 0.73 Rf        | 12.8 AU      | 0.82 Rf      | 292.9 AU   | 92.83 % | 0.89 Rf      | 0.8 AU     | 12934.2 AU | 93.77 % |     |

### S3.7. Pongamol (IN-299) HPLC purity: 99%.

HPLC Method:

|              |                                                                  |
|--------------|------------------------------------------------------------------|
| Mobile Phase | Methanol(B) : Water : Acetic acid (isocratic)<br>85 : 13.5 : 1.5 |
| Flow rate    | 0.5 ml/min.                                                      |
| Column       | Chromolith RP-18 ( Merck, 5um, 4x250mm.)                         |
| Column Temp. | 30 degree                                                        |
| Stop time    | 50 min.                                                          |
| wavelength   | 350 nm.                                                          |

### SAMPLE INFORMATION

|                   |              |                     |                            |
|-------------------|--------------|---------------------|----------------------------|
| Sample Name:      | Pongamol     | Acquired By:        | System                     |
| Sample Type:      | Standard     | Date Acquired:      | 10/25/2011 4:41:34 PM      |
| Vial:             | 5            | Acq. Method Set:    | Pongamol                   |
| Injection #:      | 1            | Date Processed:     | 10/27/2011 11:19:08 AM     |
| Injection Volume: | 10.00 ul     | Processing Method:  | pongamol                   |
| Run Time:         | 50.0 Minutes | Channel Name:       | W2996 350.0nm-1.2          |
| Sample Set Name:  | Pongamol     | Proc. Chnl. Descr.: | W2996 PDA 350.0 nm at 1.2  |
| column_name       | RP-18,5um    | Flow rate:          | 0.5 ml/min                 |
|                   |              | Sample conc:        | 0.3 mg/mL MeOH             |
|                   |              | Mobile phase:       | MeOH:H2O:AcOH(85:13.5:1.5) |

Auto-Scaled Chromatogram

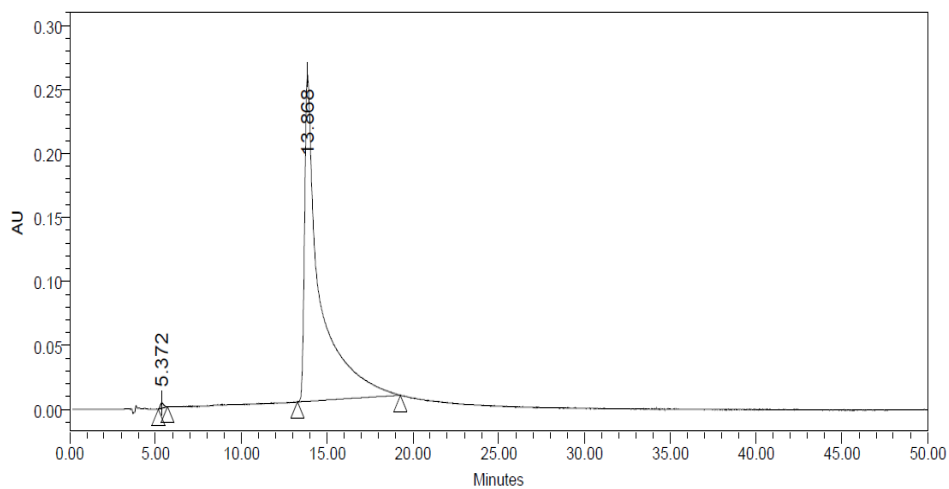

|   | RT     | Area<br>( $\mu\text{V}\cdot\text{sec}$ ) | % Area | Height<br>( $\mu\text{V}$ ) |
|---|--------|------------------------------------------|--------|-----------------------------|
| 1 | 5.372  | 59974                                    | 0.38   | 4217                        |
| 2 | 13.868 | 15660961                                 | 99.62  | 255189                      |



### S3.8. Phellopterin (IN-309) HPC purity: 99%.

HPLC Method:

|              |                                          |
|--------------|------------------------------------------|
| Mobile Phase | ACN (B), 1.5% Acetic acid in water (A)   |
| Time         | 0.01 5 65 67 70 75                       |
| B (%)        | 8 8 75 75 8 8                            |
| Flow rate    | 1 ml/min.                                |
| Column       | Chromolith RP-18 ( Merck, 5um, 4x250mm.) |
| Column Temp. | 30 degree                                |
| Stop time    | 75 min.                                  |
| wavelength   | 254 nm.                                  |

## NPC DIVISION IIIM JAMMU

Reported by User: System

Project Name: NPC8

### SAMPLE INFORMATION

|                   |              |                     |                                 |
|-------------------|--------------|---------------------|---------------------------------|
| Sample Name:      | Phellopterin | Acquired By:        | System                          |
| Sample Type:      | Standard     | Date Acquired:      | 1/29/2012 2:37:28 AM            |
| Vial:             | 10           | Acq. Method Set:    | Belarica 1                      |
| Injection #:      | 1            | Date Processed:     | 1/30/2012 12:28:44 PM           |
| Injection Volume: | 10.00 ul     | Processing Method:  | Coumarins                       |
| Run Time:         | 75.0 Minutes | Channel Name:       | W2906 254.0nm-1.2               |
| Sample Set Name:  | Coumarin     | Proc. Chnl. Descr.: | W2906 PDA 254.0 nm at 1.2       |
| column_name       | RP-18,5um    | Flow rate:          | 1 ml/min                        |
|                   |              | Sample conc:        | 0.5 mg/mL MeOH                  |
|                   |              | Mobile phase:       | ACN:1.5%AcOH in water(gradient) |

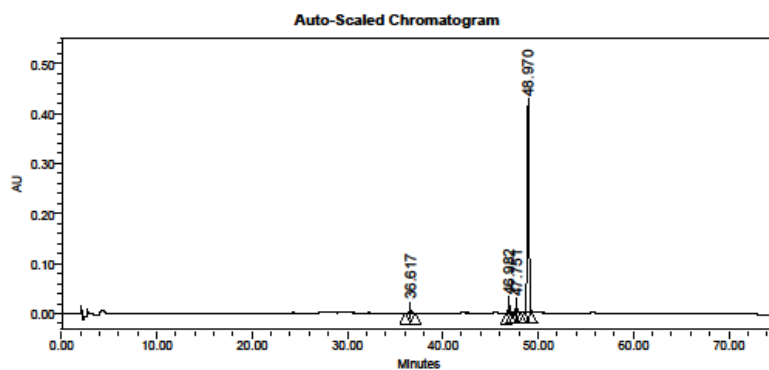

|   | RT     | Area<br>( $\mu\text{V}\cdot\text{sec}$ ) | % Area | Height<br>( $\mu\text{V}$ ) |
|---|--------|------------------------------------------|--------|-----------------------------|
| 1 | 36.617 | 54569                                    | 0.97   | 4610                        |
| 2 | 46.982 | 157289                                   | 2.80   | 13557                       |
| 3 | 47.751 | 165824                                   | 2.95   | 10385                       |
| 4 | 48.970 | 5244688                                  | 93.28  | 411471                      |

### S3.9. (IN-333) HPC purity: 99.5%.

HPLC Method:

|              |                                         |
|--------------|-----------------------------------------|
| Mobile Phase | ACN (B), 1.5% Acetic acid in water (A)  |
| Time         | 0.01 5 20 25 30 35                      |
| B (%)        | 5 5 90 90 5 5                           |
| Flow rate    | 0.5 ml/min.                             |
| Column       | Chromolith RP-18 (Merck, 5um, 4x250mm.) |
| Column Temp. | 30 degree                               |
| Stop time    | 35 min.                                 |
| wavelength   | 254 nm.                                 |

| SAMPLE INFORMATION |                          |                     |                    |
|--------------------|--------------------------|---------------------|--------------------|
| Sample Name:       | RM-47                    | Acquired By:        | System             |
| Sample Type:       | Unknown                  | Sample Set Name:    | REPOSITORY02052012 |
| Vial:              | 2                        | Acq. Method Set:    | Repository02052012 |
| Injection #:       | 1                        | Processing Method:  | repository04052012 |
| Injection Volume:  | 10.00 ul                 | Channel Name:       | 215.0nm            |
| Run Time:          | 35.0 Minutes             | Proc. Chnl. Descr.: | PDA 215.0 nm       |
| Date Acquired:     | 5/2/2012 2:44:31 PM IST  |                     |                    |
| Date Processed:    | 5/7/2012 10:02:06 AM IST |                     |                    |

Auto-Scaled Chromatogram

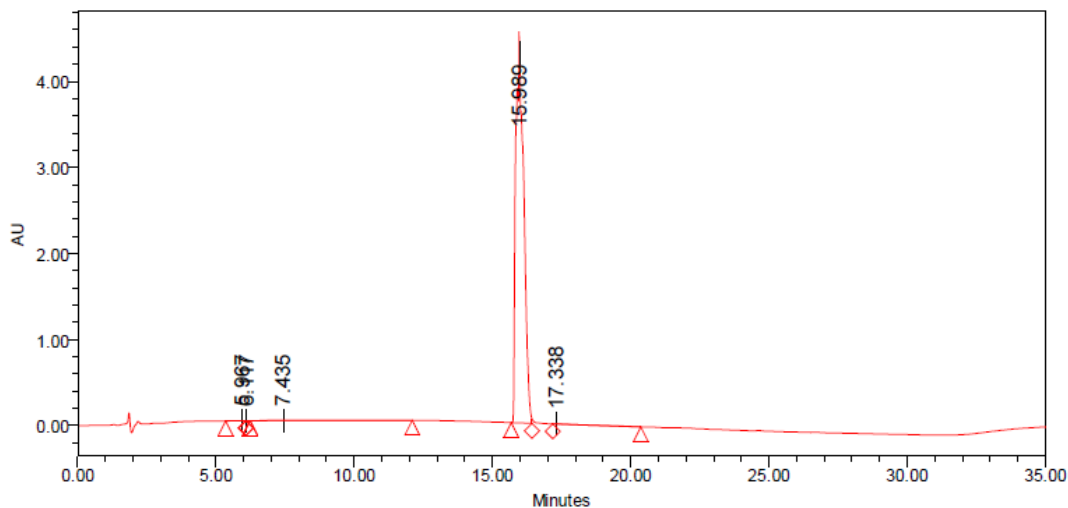

Peak Results

|   | Name | RT     | Area     | Height  | % Area |
|---|------|--------|----------|---------|--------|
| 1 |      | 5.967  | 3901     | 198     | 0.00   |
| 2 |      | 6.117  | 1009     | 189     | 0.00   |
| 3 |      | 7.435  | 222962   | 1393    | 0.25   |
| 4 |      | 15.989 | 89854010 | 4366314 | 99.55  |
| 5 |      | 17.338 | 180309   | 4241    | 0.20   |

### S3.10. (IN-416) HPC purity: 99.99%.

HPLC Method:

|              |                                                                       |
|--------------|-----------------------------------------------------------------------|
| Mobile Phase | ACN (B), water (A) gradient<br>Time 0.0 10 15 18<br>B (%) 2 100 100 2 |
| Flow rate    | 0.8 ml/min.                                                           |
| Column       | Chromolith RP-18 (Merck, 5um, 4x250mm.)                               |
| Column Temp. | 30 degree                                                             |
| Stop time    | 18 min.                                                               |
| wavelength   | 254 nm.                                                               |

### Natural Product Chemistry

NPN-8 (Offline)  
USER: Baljinder  
D:\Agilent Technologies\Result\BS\061212.rs1t\061212-0004 D:\Agilent  
Technologies\Method\ACN-H2O gradient 100 nm.met  
12/6/2012 6:11:43 PM (GMT +05:30)

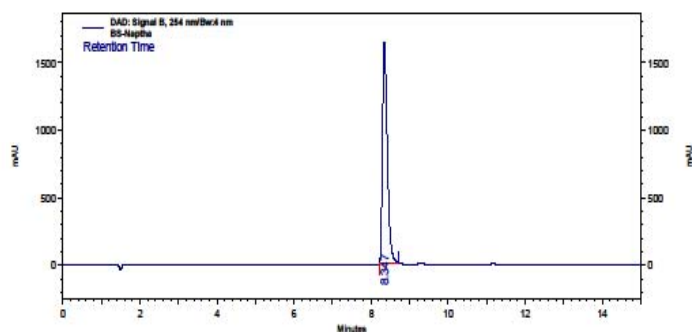

DAD: Signal  
B, 254  
nm/Bw:4 nm  
Results

| Retention<br>Time | Area Percent | Height<br>Percent | Area     | Height  |
|-------------------|--------------|-------------------|----------|---------|
| 8.347             | 100.000      | 100.000           | 29626002 | 2421722 |
| Totals            | 100.000      | 100.000           | 29626002 | 2421722 |

### S3.11. (IN-475) HPLC purity: 99.50%.

HPLC Method:

|              |                                                                             |
|--------------|-----------------------------------------------------------------------------|
| Mobile Phase | ACN (B), water (A) gradient<br>Time 0.0 30 35 40 45<br>B (%) 10 90 90 10 10 |
| Flow rate    | 0.7 ml/min.                                                                 |
| Column       | Chromolith RP-18 (Merck, 5um, 4x250mm.)                                     |
| Column Temp. | 30 degree                                                                   |
| Stop time    | 45 min.                                                                     |
| wavelength   | 254 nm.                                                                     |

#### Area % Report

Page 1 of 1

Data File: D:\Agilent Technologies\Result\SUNIL\repo 3,6,11,12,15,32,35,37,44.rslt\1  
Method: D:\Agilent Technologies\Method\sunil\Sunil-GRAD 01.met  
Acquired: 1/29/2013 10:40:21 PM (GMT +05:30)  
Printed: 1/30/2013 10:54:56 AM (GMT +05:30)

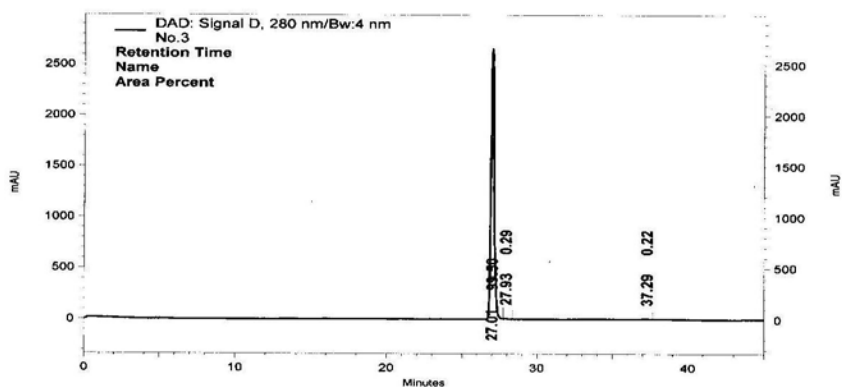

#### DAD: Signal D, 280 nm/Bw:4 nm Results

| Name          | Retention Time | Area            | Height         | Area %        |
|---------------|----------------|-----------------|----------------|---------------|
|               | 27.007         | 82999307        | 5567538        | 99.50         |
|               | 27.927         | 240845          | 17516          | 0.29          |
|               | 37.287         | 179449          | 8206           | 0.22          |
| <b>Totals</b> |                | <b>83419601</b> | <b>5593260</b> | <b>100.00</b> |

#### S4. Karanjin is a competitive inhibitor of CYP1A1

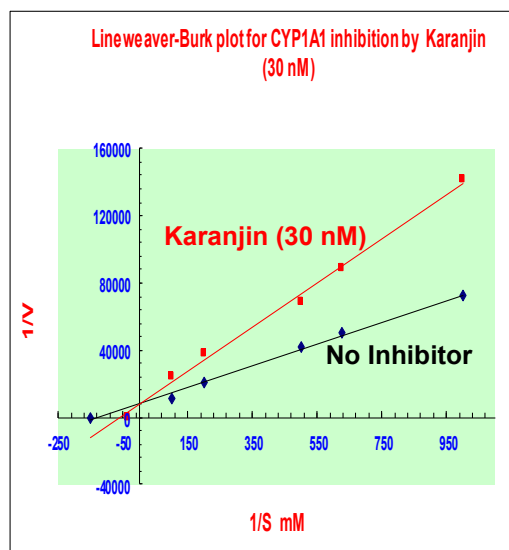

*In case of Karanjin,  $V_{max}$  is unaltered, while slope has changed while  $K_m$  is increased from 6.6 mM to 23 mM. Karanjin was incubated with enzyme for 45 min. Similar results were obtained by incubation of karanjin with CYP1A1 for 5, 10, 20 and 30 min. This clearly shows that karanjin is a competitive inhibitor of CYP1A1.*

### S5. MD simulation and interactions of isopimpinellin (IN-475) with CYP1A1

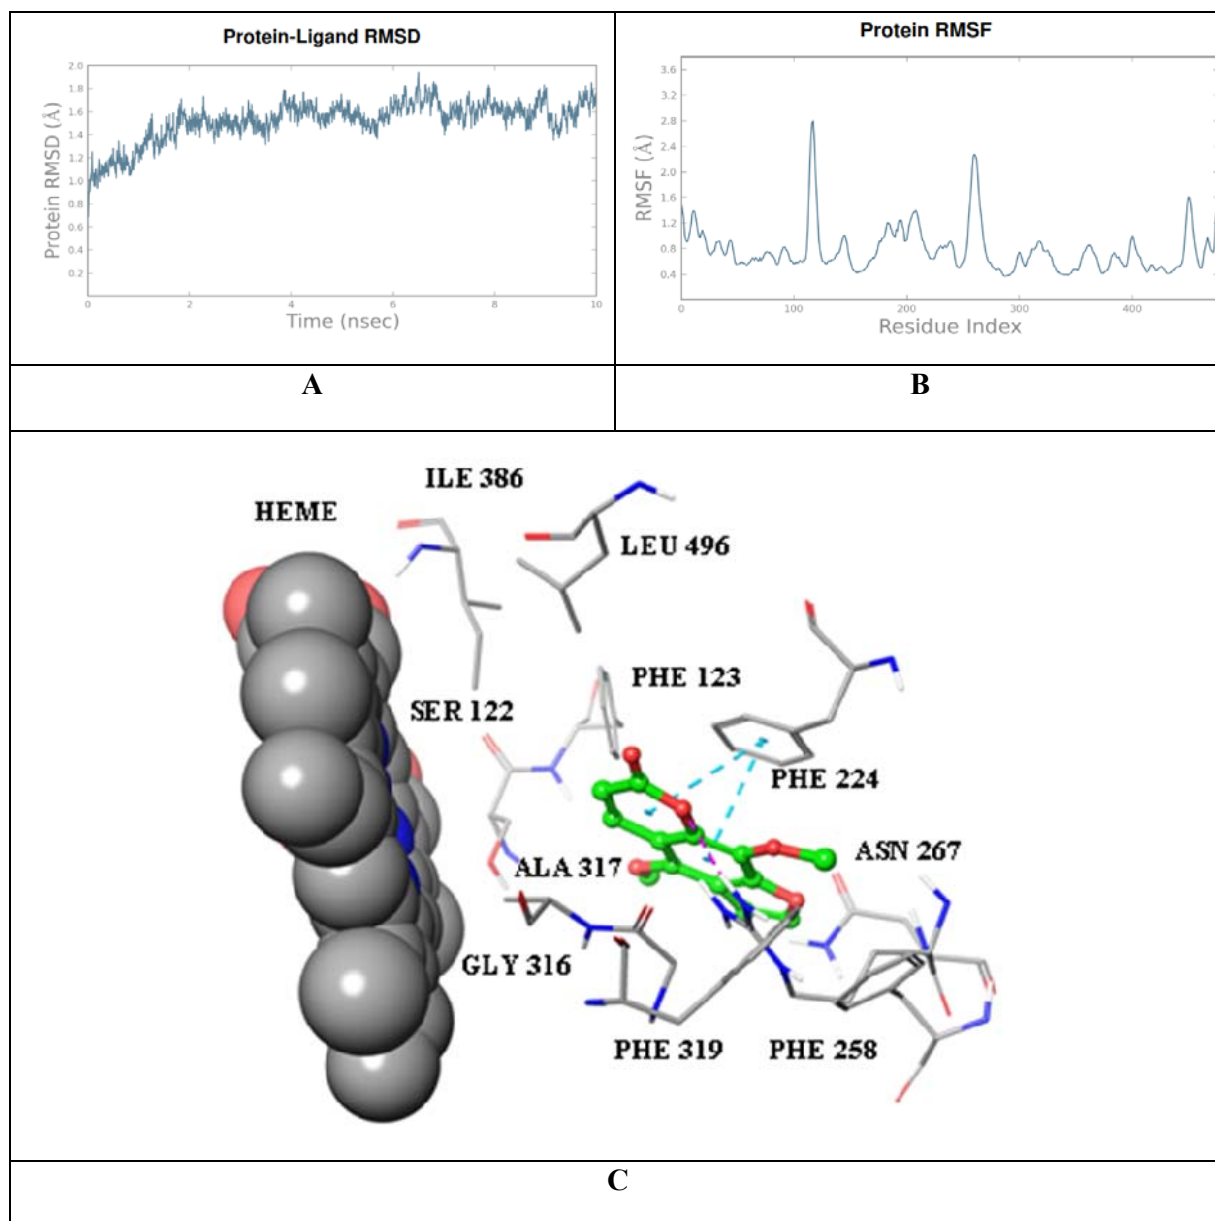

**S6.** Interactions of isopimpinellin (IN-475) with CYP1 CYP2 and CYP3 family isoform. A: CYP1A2, B: CYP1B1, C: CYP2D6, D: CYP3A4, E: CYP2C9, F: CYP2C19.

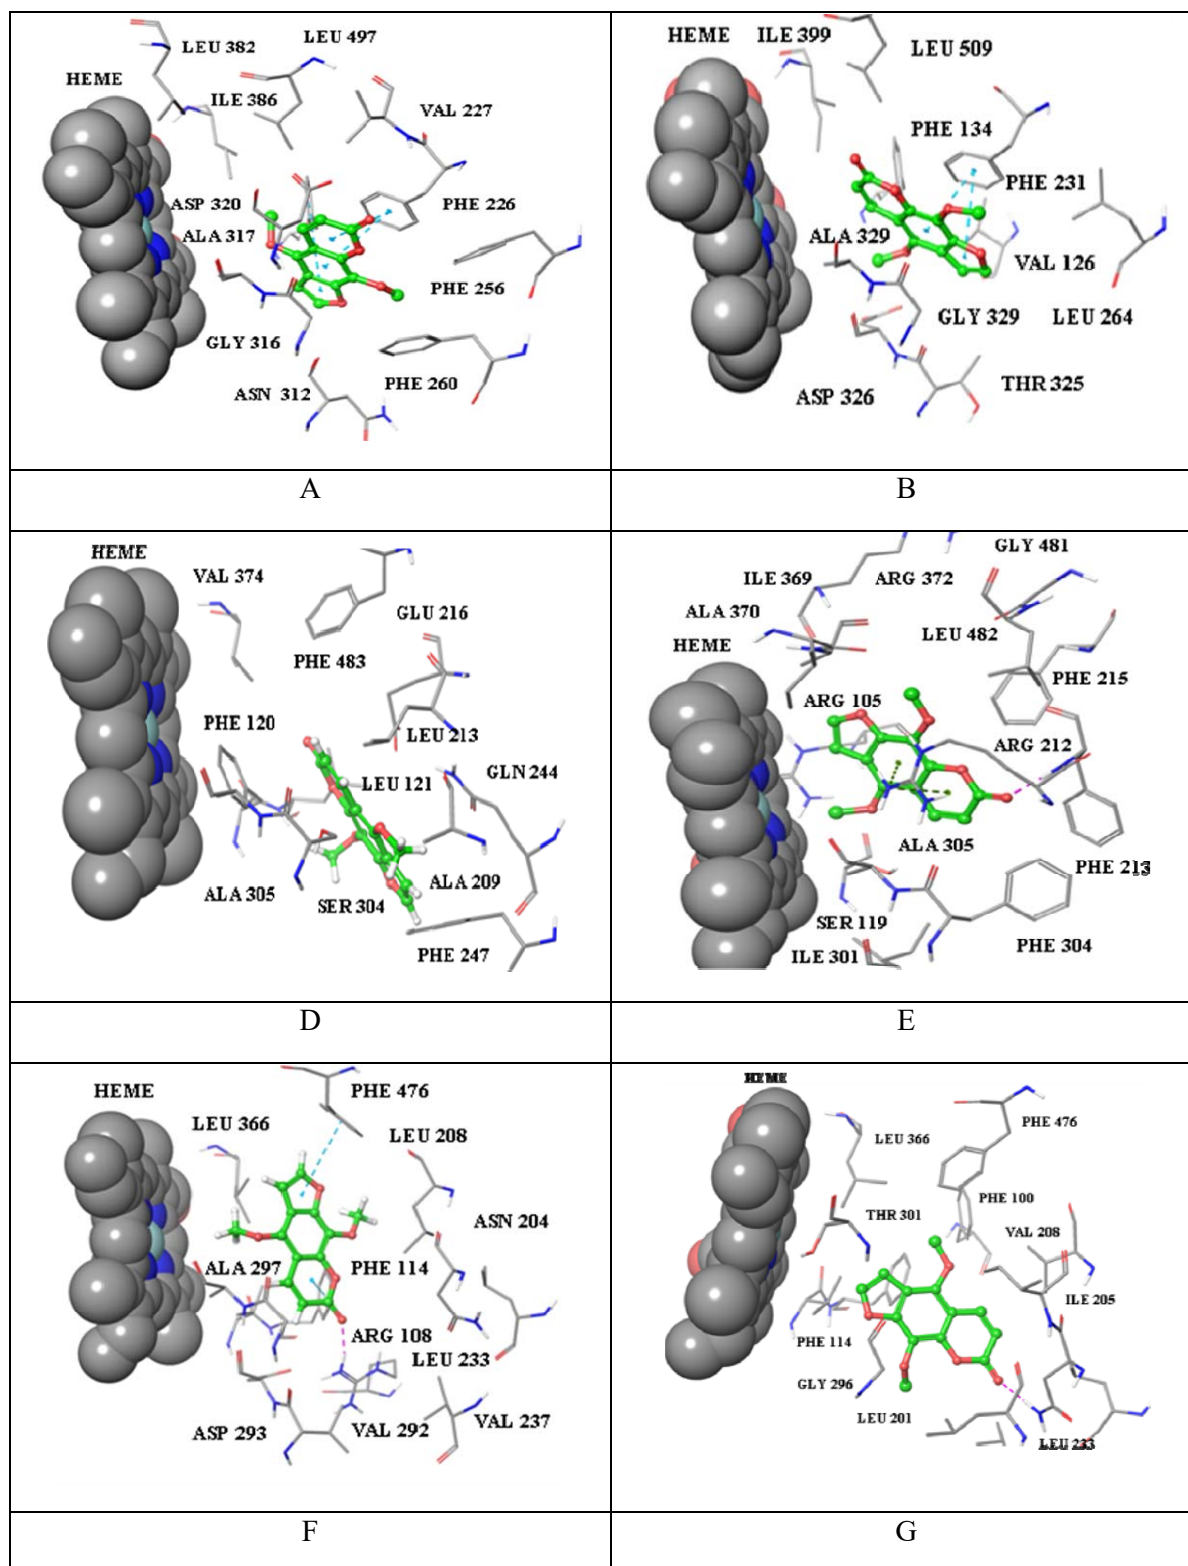

**S7.** Interactions of karanjin (**IN-195**) with CYP2 and CYP3 family isoform. A: CYP2D6, B: CYP3A4, C: CYP2C9. D: CYP2C19.

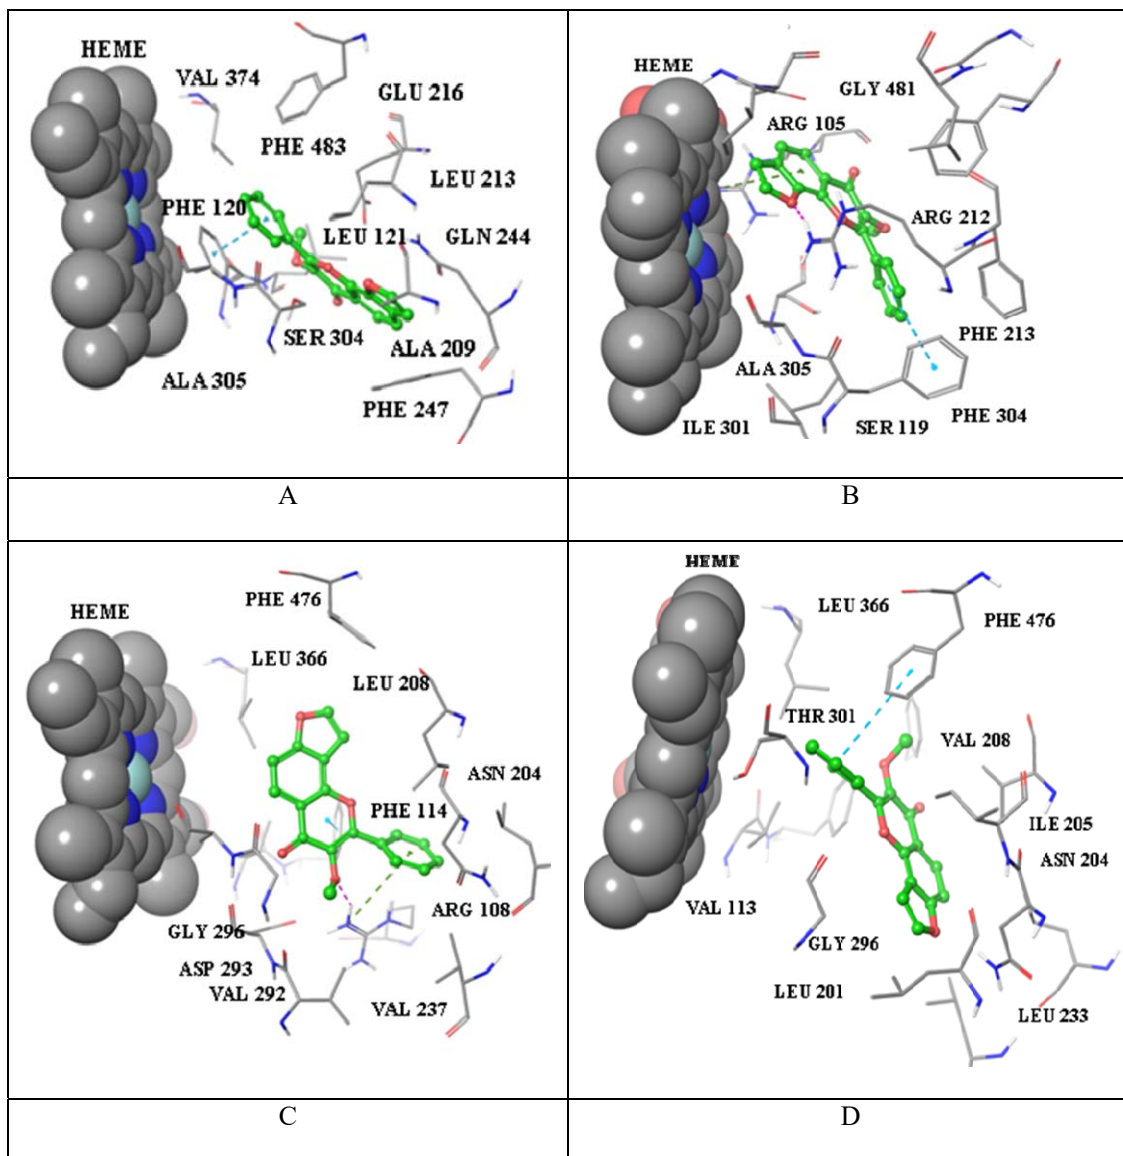



## S8: NMR, HPLC and HRMS data scans of IN-195 and IN-475

### S8.1. $^1\text{H}$ , $^{13}\text{C}$ NMR, DEPT135 NMR ( $\text{CDCl}_3$ ) and HPLC of karanjin (IN-195)

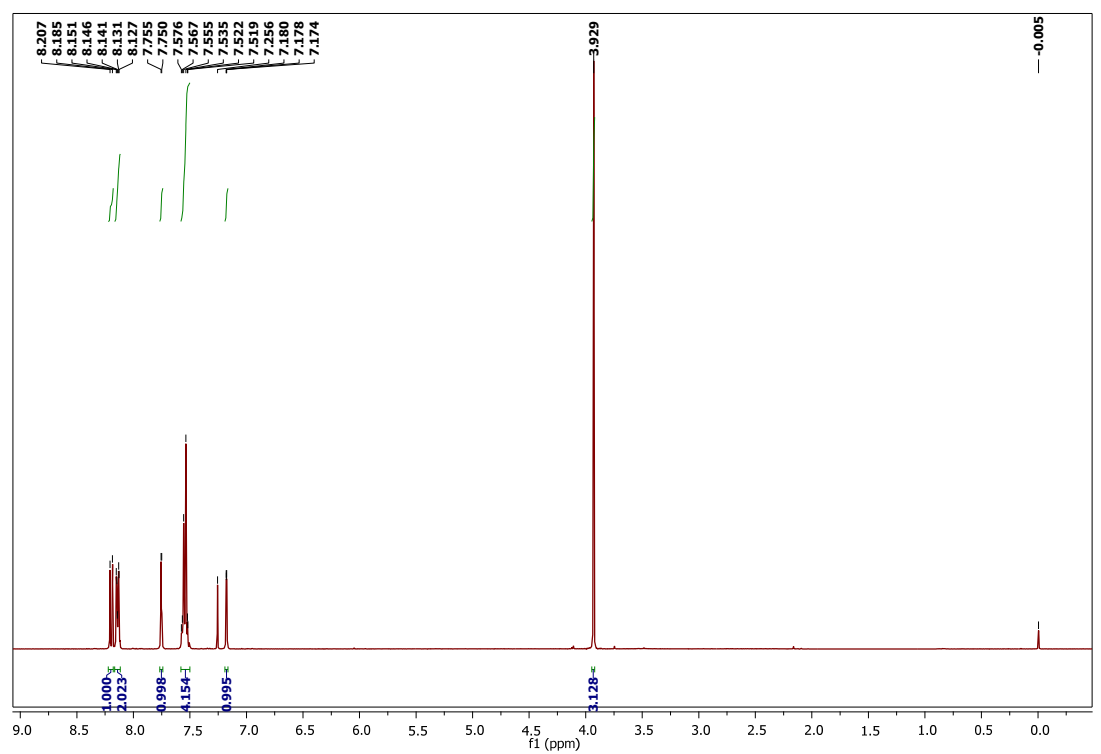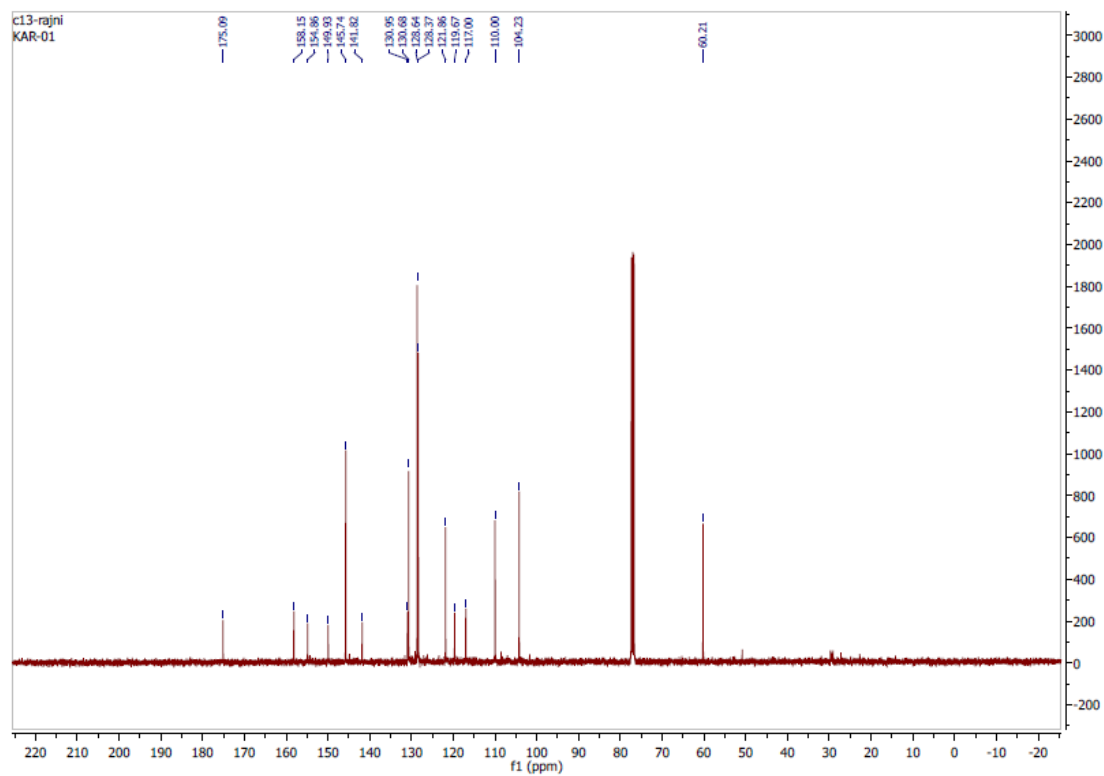

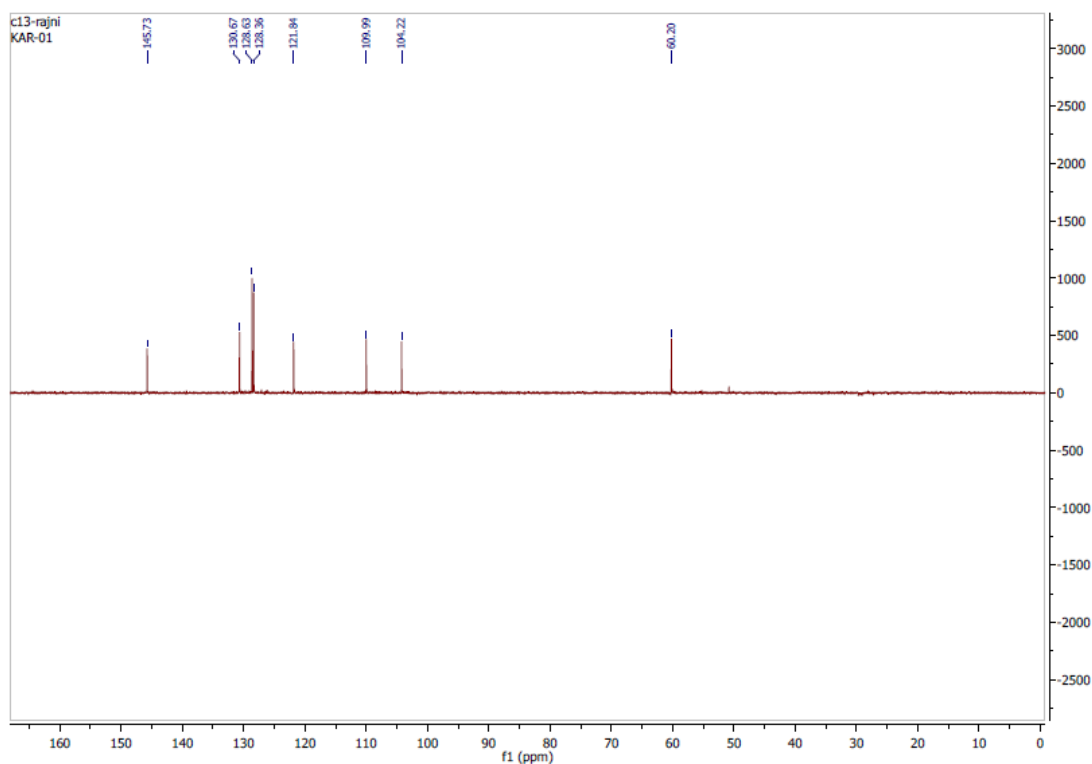

HPLC method:

| Compound | Mobile phase                                                                                                                                                                                                                                                                                                                                          | Detection wavelength (nm) | Retention time (min) | % purity |
|----------|-------------------------------------------------------------------------------------------------------------------------------------------------------------------------------------------------------------------------------------------------------------------------------------------------------------------------------------------------------|---------------------------|----------------------|----------|
| IN-195   | 0.1% Formic acid- MeOH @<br>1ml/min<br>Injection volume 3uL<br>Column oven temp. 37 °C<br>Column C18 Chromolith®<br>performance RP-18e (100-4.6 mm)<br>0.01 Pumps Pump B Conc. 70<br>2 Pumps Pump B Conc. 70<br>10 Pumps Pump B Conc. 10<br>12 Pumps Pump B Conc. 10<br>17 Pumps Pump B Conc. 70<br>20 Pumps Pump B Conc. 70<br>20.01 Controller Stop | 326                       | 13.119               | 100      |

## <Sample Information>

Sample Name : IN-195  
 Sample ID :  
 Data Filename : IN-195.lcd  
 Method Filename : NPC-290 salt screening method file.lcm  
 Batch Filename : Surfactant screening- dissolution test-28th Sept 2017.lcb  
 Vial # : 1-51 Sample Type : Unknown  
 Injection Volume : 3 uL  
 Date Acquired : 29-09-2017 14:59:02 Acquired by : System Administrator  
 Date Processed : 29-09-2017 15:21:14 Processed by : System Administrator

## <Chromatogram>

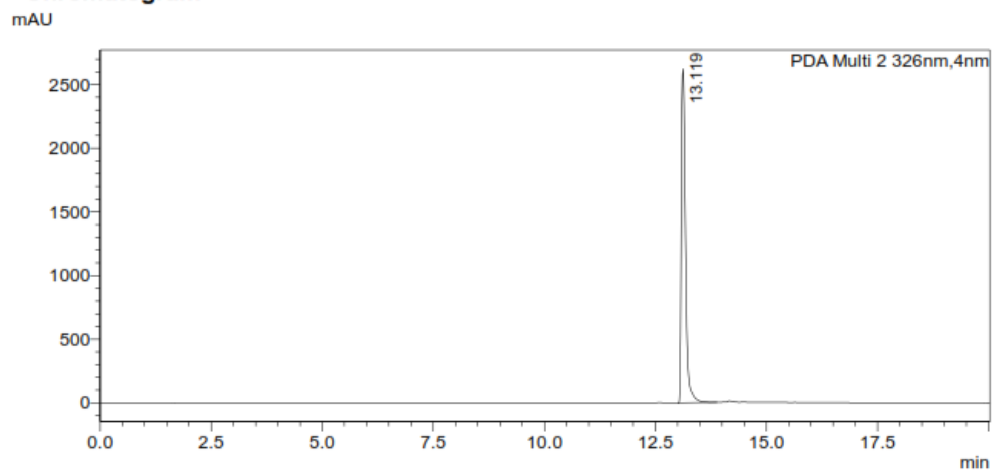

## <Peak Table>

PDA Ch2 326nm

| Peak# | Name   | Ret. Time | Area%   |
|-------|--------|-----------|---------|
| 1     | IN-195 | 13.119    | 100.000 |
| Total |        |           | 100.000 |

The newly isolated 'karanjin' as a powdered form was later used to determine IC<sub>50</sub> / Ki values and further cell based experiments. The HPLC purity of this sample is provided above.

| Compound Label     | m/z     | RT    | Algorithm                 | Mass     |
|--------------------|---------|-------|---------------------------|----------|
| Cpd 73: C18 H12 O4 | 293.081 | 0.195 | Find by Molecular Feature | 292.0738 |

MFE MS Spectrum

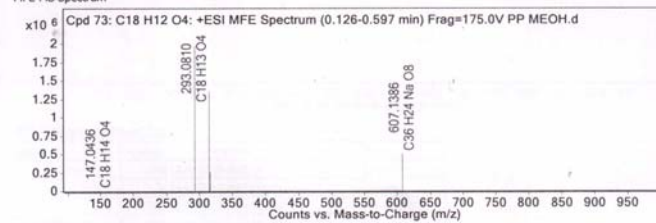

MS Spectrum Peak List

| m/z      | z | Abund      | Formula       | Ion      |
|----------|---|------------|---------------|----------|
| 147.0436 | 2 | 5580.82    | C18 H14 O4    | (M+2H)+2 |
| 293.081  | 1 | 1965383.38 | C18 H13 O4    | (M+H)+   |
| 294.0847 | 1 | 343819.56  | C18 H13 O4    | (M+H)+   |
| 315.0631 | 1 | 1340063.13 | C18 H12 Na O4 | (M+Na)+  |
| 316.0666 | 1 | 251879.34  | C18 H12 Na O4 | (M+Na)+  |
| 602.1804 | 1 | 1506.57    | C36 H28 N O8  | (2M+NH)+ |
| 607.1386 | 1 | 496920.09  | C36 H24 Na O8 | (2M+Na)+ |
| 608.1413 | 1 | 180297.22  | C36 H24 Na O8 | (2M+Na)+ |

Predicted Isotope Match Table

| Isotope | m/z      | Calc m/z | Diff (ppm) | Abund % | Calc Abund % | Abund Sum % | Calc Abund Sum % |
|---------|----------|----------|------------|---------|--------------|-------------|------------------|
| 1       | 147.0436 | 147.0441 | 3.34       | 100     | 100          | 100         | 100              |

## S8.2. $^1\text{H}$ NMR ( $\text{CDCl}_3 + \text{CD}_3\text{OD}$ ), HPLC and HRESI-MS of isopimpinellin (IN-475)

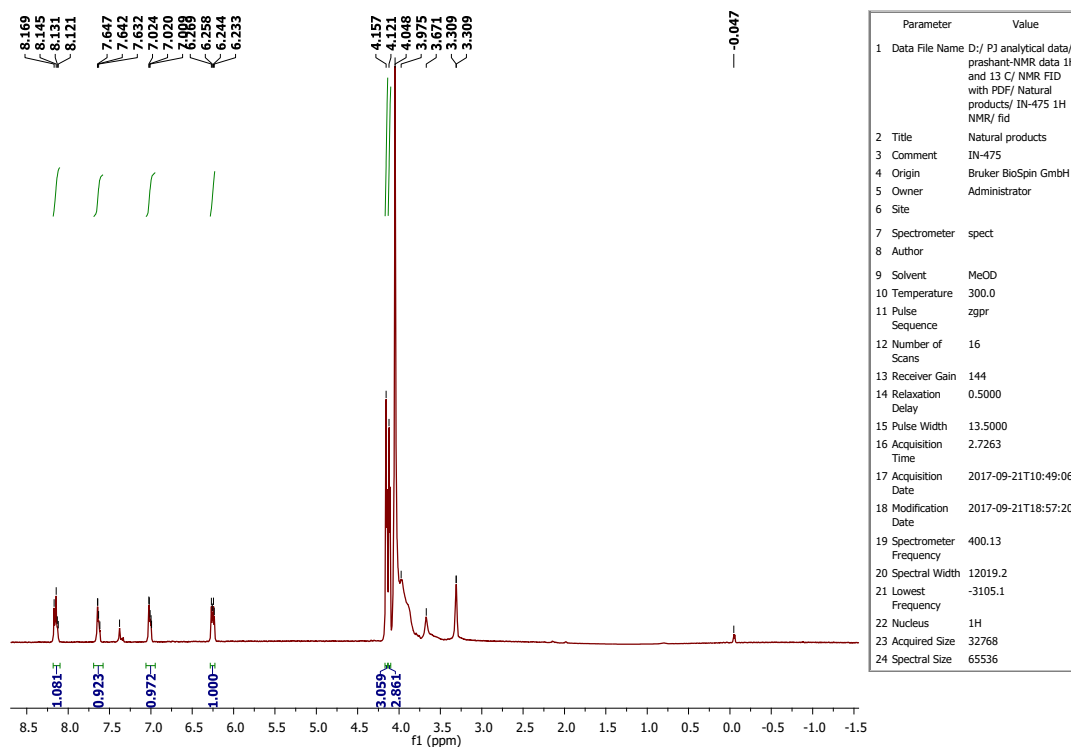

| Compound | Mobile phase                                                                                                                                                                                                                                                                                                                                    | Detection wavelength (nm) | Retention time (min) | % purity |
|----------|-------------------------------------------------------------------------------------------------------------------------------------------------------------------------------------------------------------------------------------------------------------------------------------------------------------------------------------------------|---------------------------|----------------------|----------|
| IN-475   | 0.1% Formic acid- MeOH @ 1ml/min<br>Injection volume 3uL<br>Column oven temp. 37 °C<br>Column C18 Chromolith® performance RP-18e (100-4.6 mm)<br>0.01 Pumps Pump B Conc. 70<br>2 Pumps Pump B Conc. 70<br>10 Pumps Pump B Conc. 10<br>12 Pumps Pump B Conc. 10<br>17 Pumps Pump B Conc. 70<br>20 Pumps Pump B Conc. 70<br>20.01 Controller Stop | 267                       | 10.289               | 99.774   |

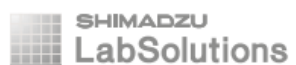

## Analysis Report

### <Sample Information>

Sample Name : IN-475  
 Sample ID :  
 Data Filename : IN-475.lcd  
 Method Filename : NPC-290 salt screening method file.lcm  
 Batch Filename : Surfactant screening- dissolution test-28th Sept 2017.lcb  
 Vial # : 1-52  
 Injection Volume : 3 uL  
 Date Acquired : 29-09-2017 15:19:33  
 Date Processed : 29-09-2017 15:43:27  
 Sample Type : Unknown  
 Acquired by : System Administrator  
 Processed by : System Administrator

### <Chromatogram>

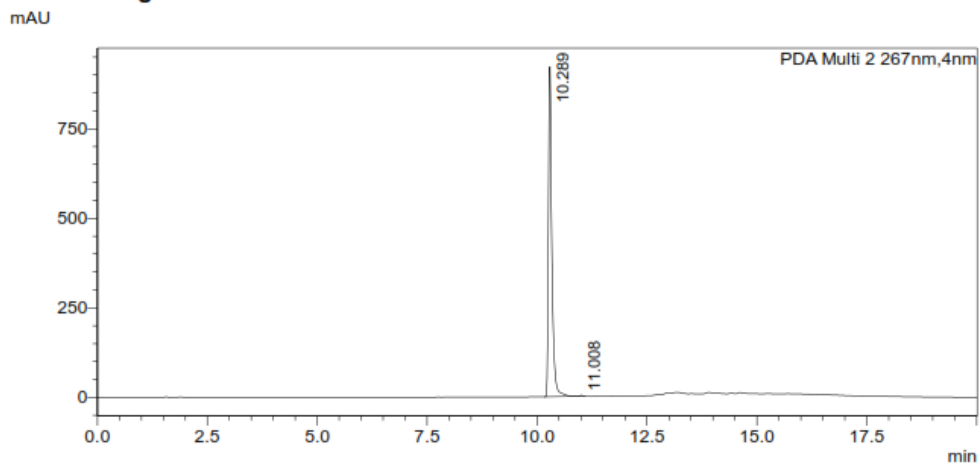

### <Peak Table>

| PDA Ch2 267nm |           |         |
|---------------|-----------|---------|
| Peak#         | Ret. Time | Area%   |
| 1             | 10.289    | 99.774  |
| 2             | 11.008    | 0.226   |
| Total         |           | 100.000 |

## Qualitative Compound Report

|                        |                   |               |                       |
|------------------------|-------------------|---------------|-----------------------|
| Data File              | IN-475.d          | Sample Name   | IN-475                |
| Sample Type            | Sample            | Position      | Vial 12               |
| Instrument Name        | Instrument 1      | User Name     |                       |
| Acq Method             | vishal_12-01-13.m | Acquired Time | 27-09-2017 PM 3:24:32 |
| IRM Calibration Status | Success           | DA Method     | Default.m             |
| Comment                |                   |               |                       |

|                |                             |       |
|----------------|-----------------------------|-------|
| Sample Group   |                             | Info. |
| Acquisition SW | 6200 series TOF/6500 series |       |
| Version        | Q-TOF B.05.01 (B5125)       |       |

### Compound Table

| Compound Label    | RT  | Mass    | Formula    | MFG Formula | MFG Diff (ppm) | DB Formula |
|-------------------|-----|---------|------------|-------------|----------------|------------|
| Cpd 7: C13 H10 O5 | 0.3 | 246.053 | C13 H10 O5 | C13 H10 O5  | -0.81          | C13 H10 O5 |

| Compound Label    | m/z      | RT  | Algorithm                 | Mass    |
|-------------------|----------|-----|---------------------------|---------|
| Cpd 7: C13 H10 O5 | 247.0603 | 0.3 | Find by Molecular Feature | 246.053 |

### MFE MS Spectrum

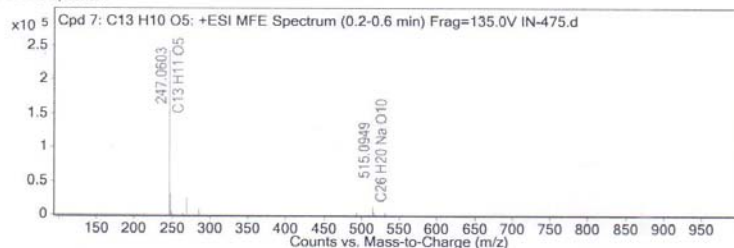

### MS Spectrum Peak List

| m/z      | z | Abund     | Formula        | Ion      |
|----------|---|-----------|----------------|----------|
| 247.0603 | 1 | 242862.34 | C13 H11 O5     | (M+H)+   |
| 248.0635 | 1 | 32038.57  | C13 H11 O5     | (M+H)+   |
| 249.0657 | 1 | 4479.71   | C13 H11 O5     | (M+H)+   |
| 269.0422 | 1 | 26075.36  | C13 H10 Na O5  | (M+Na)+  |
| 270.046  | 1 | 4631.81   | C13 H10 Na O5  | (M+Na)+  |
| 285.0159 | 1 | 9241.26   | C13 H10 K O5   | (M+K)+   |
| 493.1118 | 1 | 3327.8    | C26 H21 O10    | (2M+H)+  |
| 515.0949 | 1 | 12328.17  | C26 H20 Na O10 | (2M+Na)+ |
| 516.0976 | 1 | 3309.22   | C26 H20 Na O10 | (2M+Na)+ |
| 531.0688 | 1 | 2962.24   | C26 H20 K O10  | (2M+K)+  |

### Predicted Isotope Match Table

| Isotope | m/z      | Calc m/z | Diff (ppm) | Abund % | Calc Abund % | Abund Sum % | Calc Abund Sum % |
|---------|----------|----------|------------|---------|--------------|-------------|------------------|
| 1       | 247.0603 | 247.0601 | -0.92      | 100     | 100          | 86.71       | 85.8             |
| 2       | 248.0635 | 248.0635 | 0.01       | 13.19   | 14.38        | 11.44       | 12.34            |
| 3       | 249.0657 | 249.0656 | -0.49      | 1.84    | 1.98         | 1.6         | 1.7              |
| 4       | 250.0685 | 250.0683 | -0.91      | 0.3     | 0.19         | 0.26        | 0.16             |

--- End Of Report ---
